# Supplementary material for: The association between mental rotation capacity and motor impairment in children with obesity—an exploratory study
Source: PeerJ. 2019 Dec 11;7:e8150. doi: 10.7717/peerj.8150 (PMC6911341; doi:10.7717/peerj.8150)
Supplement: Supplemental Information 1 — This overview lists the age, gender, group and score on the Movement Assessment Battery 2 for each participant. [file peerj-07-8150-s001.csv]

ID	Group	Gender	T1age	T1_generalMC	T1_generalMC_stdscore	T1_generalMC_perc	T1_manual	T1_manual_stdscore	T1_manual_perc	T1_ball	T1_ball_stdscore	T1_ball_perc	T1_balance	T1_balance_stdscore	T1_balance_perc
sub001	OB	0	9.37	58	5	5	21	6	9	23	11	63	14	3	1
sub002	OB	0	9.69	41	2	0.5	6	1	0.1	16	8	25	19	5	5
sub003	OB	0	8.71	67	7	16	21	6	9	20	10	50	26	8	25
sub004	OB	0	10.07	52	6	9	20	5	5	8	3	1	24	7	16
sub005	OB	1	9.72	50	4	2	13	3	1	13	6	9	24	7	16
sub006	OB	0	7.75	62	6	9	24	7	16	26	14	91	12	3	1
sub007	OB	1	9.36	83	11	63	28	9	37	24	12	75	31	10	50
sub008	OB	1	8.64	84	11	63	29	9	37	20	10	50	35	14	91
sub028	OB	0	11.30	22	1	0.1	9	2	0.5	9	4	2	4	1	0.1
sub029	OB	0	10.68	41	2	0.5	18	5	5	9	4	2	14	3	1
sub030	OB	0	11.04	47	3	1	25	7	16	15	7	16	7	1	0.1
sub031	OB	1	11.21	22	1	0.1	10	2	0.5	9	4	2	3	1	0.1
sub032	OB	1	9.75	87	12	75	39	16	98	17	8	25	31	10	50
sub033	OB	0	10.36	66	7	16	34	12	75	15	7	16	17	5	5
sub034	OB	1	11.01	24	1	0.1	7	1	0.1	6	2	0.5	11	2	0.5
sub035	OB	1	10.03	67	7	16	18	5	5	25	13	84	24	7	16
sub036	OB	1	10.83	55	5	5	18	5	5	23	11	63	14	3	1
sub037	OB	0	8.52	53	4	2	17	5	5	17	8	25	19	5	5
sub038	OB	1	9.26	49	4	2	18	5	5	15	7	16	16	4	2
sub053	OB	1	9.29	42	2	0.5	14	4	2	8	3	1	20	6	9
sub054	OB	1	10.62	67	7	16	31	10	50	15	7	16	21	6	9
sub055	OB	0	8.70	74	8	25	22	6	9	21	10	50	31	10	50
sub056	OB	1	10.41	56	5	5	19	5	5	21	10	50	16	4	2
sub057	OB	1	7.59	61	5	5	32	11	63	15	7	16	14	3	1
sub058	OB	1	9.65	48	3	1	23	7	16	9	4	2	16	4	2
sub059	OB	0	11.18	57	5	5	18	5	5	22	11	63	17	5	5
sub060	OB	1	8.43	83	11	63	26	8	25	24	12	75	33	11	63
sub061	OB	0	9.99	68	7	16	32	11	63	19	9	37	17	5	5
sub062	OB	1	8.11	56	5	5	27	8	25	17	8	25	12	3	1
sub063	OB	1	8.81	56	5	5	30	10	50	18	9	37	8	1	0.1
sub065	OB	1	10.27	51	5	5	33	11	63	8	3	1	10	2	0.5
sub066	OB	0	7.82	74	8	25	31	10	50	22	11	63	21	6	9
sub110	HW	0	9.32	61	5	5	18	5	5	18	9	37	25	6	16
sub111	HW	0	7.80	81	10	50	28	9	37	23	11	63	30	9	37
sub112	HW	1	9.52	69	7	16	29	9	37	11	5	5	29	9	37
sub113	HW	0	9.48	81	10	50	30	10	50	20	10	50	31	10	50
sub114	HW	1	9.78	67	7	16	26	8	25	11	5	5	30	9	37
sub116	HW	1	9.45	98	16	98	37	14	91	27	15	95	34	12	75
sub117	HW	1	9.41	93	14	91	38	15	95	24	12	75	31	10	50
sub118	HW	0	9.54	66	7	16	21	6	9	20	10	50	25	7	16
sub119	HW	0	10.68	80	10	50	25	7	16	22	11	63	33	11	63
sub120	HW	0	9.82	60	5	5	16	5	5	19	9	37	25	7	16
sub122	HW	0	8.26	90	13	84	34	12	75	26	14	91	30	9	37
sub123	HW	0	8.61	90	13	84	34	12	75	27	15	95	29	9	37
sub124	HW	0	10.45	67	7	16	32	11	63	11	5	5	24	7	16
sub125	HW	0	7.98	75	9	37	27	8	25	25	13	84	23	7	16
sub126	HW	1	10.95	78	9	37	31	10	50	20	10	50	27	7	25
sub127	HW	0	10.60	83	11	63	25	7	16	25	13	84	33	11	63
sub140	HW	0	8.09	80	10	50	27	8	25	20	10	50	33	11	63
sub144	HW	1	8.74	66	7	16	28	9	37	9	4	2	29	9	37
sub145	HW	0	8.78	84	11	63	35	13	84	18	9	37	31	10	50
sub146	HW	0	10.40	81	10	50	30	10	50	22	11	63	29	9	37
sub147	HW	0	11.51	74	8	25	23	7	16	17	8	25	34	12	75
sub148	HW	0	8.84	82	10	50	34	12	75	9	4	2	39	17	99
sub149	HW	0	11.56	80	10	50	30	10	50	18	9	37	32	10	50
sub151	HW	1	8.03	74	8	25	29	9	37	16	8	25	29	9	37
sub152	HW	0	10.88	79	10	50	27	8	25	20	10	50	32	10	50
