# Supplementary material for: The association between mental rotation capacity and motor impairment in children with obesity—an exploratory study
Source: PeerJ. 2019 Dec 11;7:e8150. doi: 10.7717/peerj.8150 (PMC6911341; doi:10.7717/peerj.8150)
Supplement: Supplemental Information 2 — This file lists the judgement (1=correct; 0=incorrect) and response time (in ms) for each trial per participant. [file peerj-07-8150-s002.csv]

		RESPONSE TIME (RsT)				CORRECT (1=yes; 0=no)
		PALM_LEFT	PALM_RIGHT	BACK_LEFT	BACK_RIGHT	PALM_LEFT	PALM_RIGHT	BACK_LEFT	BACK_RIGHT
sub001	0	3078	2462	1765	2684	1	1	1	1
	0	1432	2356	1516	5222	1	1	1	0
	0	5702	425	3630	1090	1	0	1	1
	0	2797	368	2904	1083	1	1	1	1
	0	1828	4358	1622	1972	1	1	1	1
	0	3350	3020	1052	2184	1	1	1	1
	60	1686	3655	1125	1520	1	1	1	1
	60	1120	1744	1896	1154	1	1	1	1
	60	1392	844	906	1160	0	0	1	1
	60	4826	350	2066	1115	0	0	1	1
	60	3227	2049	810	2026	1	1	1	1
	60	3156	3165	3104	1149	1	1	1	1
	120	1729	218	1894	1249	1	0	1	0
	120	2437	1437	1630	2411	1	1	1	1
	120	1500	927	2891	1471	0	1	1	1
	120	1753	3550	2730	641	0	1	1	1
	120	7044	3205	1413	1926	1	1	1	1
	120	1603	1943	2516	2198	1	1	1	0
	180	2397	2137	4201	1762	0	1	1	1
	180	2208	2443	4692	1281	1	1	1	0
	180	5110	637	817	1113	0	1	0	1
	180	4284	7505	5868	1330	0	0	1	1
	180	6184	2810	7210	2817	0	1	1	0
	180	5079	3030	8000	5393	1	1	0	0
	240	2534	8000	8000	3332	0	0	0	0
	240	1121	8000	5297	3557	0	0	0	1
	240	4810	1504	834	4204	0	1	0	1
	240	616	3949	326	4972	0	0	0	0
	240	8000	8000	2650	1693	0	0	1	0
	240	3175	4192	3650	4461	1	1	1	1
	300	6340	4334	5187	2644	1	0	0	1
	300	3443	1362	4497	2691	1	0	1	1
	300	1435	3374	1079	4575	0	0	0	1
	300	2053	788	509	403	0	0	1	1
	300	7043	6244	3047	4014	1	1	1	1
	300	2405	6958	1868	2006	0	0	1	1
sub002	0	868	2752	992	394	1	1	1	0
	0	3425	396	1738	1874	1	1	1	0
	0	1919	2522	1600	3285	0	1	1	0
	0	3154	1340	3343	1245	0	0	1	0
	0	848	871	1179	959	1	0	0	0
	0	1388	736	1619	2719	1	0	1	1
	60	625	318	591	966	1	1	1	1
	60	1032	966	1568	2902	1	0	1	1
	60	964	1148	2369	1149	1	1	1	1
	60	2087	1833	649	1657	1	1	1	1
	60	2424	2964	1275	2060	0	1	1	1
	60	1151	840	698	614	1	1	1	1
	120	1549	720	1146	1486	1	1	1	0
	120	710	978	1360	753	1	1	1	1
	120	1367	3887	2724	8000	1	1	1	0
	120	1132	2309	4728	1986	1	1	1	1
	120	163	941	1915	1387	1	1	1	1
	120	1207	677	1462	1337	1	1	1	1
	180	2221	1675	1503	1142	1	0	1	0
	180	3634	977	2205	580	1	1	1	0
	180	3424	1709	1626	1422	1	1	1	1
	180	780	952	1250	1246	1	0	1	1
	180	886	4179	4153	2452	1	1	0	0
	180	1032	1082	1290	8000	1	1	0	0
	240	3144	4028	793	3187	0	1	0	0
	240	1379	685	1058	2856	1	0	0	0
	240	504	2016	654	941	1	0	0	0
	240	1406	866	1012	1030	0	0	0	0
	240	703	2253	1394	1050	0	0	0	0
	240	1201	716	838	1153	0	1	0	0
	300	1313	1483	1470	1562	0	0	0	0
	300	2086	730	962	621	1	0	0	0
	300	1307	4171	726	3855	0	0	0	0
	300	1309	1086	1005	1982	0	1	0	0
	300	2868	5175	445	809	0	1	0	0
	300	1200	2371	1248	804	0	0	0	0
sub003	0	1858	6133	1256	3197	1	1	1	1
	0	1986	2432	1571	1522	1	1	1	1
	0	2154	2478	1935	2540	1	1	1	1
	0	2524	1353	2992	2103	1	1	1	1
	0	3335	2770	2349	1631	1	1	1	1
	0	1758	1776	2004	1712	1	1	1	1
	60	2399	1368	1460	1574	1	0	1	1
	60	572	1798	1498	1609	1	1	1	1
	60	1294	1304	1286	1142	1	1	1	1
	60	1930	1817	3312	1052	1	1	1	1
	60	1840	1458	1633	1678	0	1	1	1
	60	6139	2047	1775	1717	0	1	1	1
	120	2182	1416	2585	1952	1	1	1	1
	120	1206	2158	1589	1996	1	1	1	1
	120	4275	3050	5314	1999	1	1	0	1
	120	1549	2151	1672	2748	1	0	1	1
	120	1640	1859	4152	2493	1	1	1	1
	120	2249	2070	1716	2143	1	1	1	1
	180	2680	2396	2289	2266	1	1	0	0
	180	3246	1322	3804	1972	1	0	0	1
	180	2335	3274	2669	2667	1	0	0	1
	180	1338	2262	1006	3615	1	1	0	1
	180	1480	2705	2536	2603	1	0	1	1
	180	1394	2560	6032	1471	1	1	1	0
	240	2071	5031	3582	4369	0	0	1	0
	240	1014	4928	3992	3065	0	0	1	0
	240	6686	1397	1807	2561	0	0	1	1
	240	3070	4329	4406	3181	1	0	1	1
	240	8001	2398	3889	3993	0	0	0	0
	240	1949	4964	1259	1007	1	0	0	1
	300	1303	2161	4601	1387	0	0	1	0
	300	2350	2344	2697	2304	1	1	1	1
	300	2735	2101	2775	1836	1	1	1	1
	300	2837	1838	3964	2249	1	1	1	1
	300	2342	2256	2290	3341	0	0	0	1
	300	2670	1276	2724	2281	1	1	1	1
sub004	0	2886	1405	1166	1140	1	1	1	1
	0	2137	1842	2587	2691	1	1	1	1
	0	1639	1911	1568	1375	1	1	1	1
	0	1666	6532	2874	1494	1	1	1	1
	0	2635	2514	1994	2061	1	1	1	1
	0	3160	2553	2040	1727	1	1	1	1
	60	2378	1662	1724	1052	1	1	1	1
	60	1230	1123	1727	1139	1	1	1	1
	60	1419	1432	2003	1690	1	1	1	1
	60	1921	1069	1056	2010	1	1	1	1
	60	1658	1177	1779	2439	1	1	1	1
	60	1684	2268	1456	935	1	1	1	1
	120	1325	1543	2015	1399	1	1	1	1
	120	1615	1709	2661	1346	1	1	1	1
	120	2824	2065	1464	1801	1	1	1	1
	120	1360	2056	2404	1557	1	1	1	1
	120	1596	1945	1543	1360	1	1	1	1
	120	1451	1291	1813	1081	1	1	1	1
	180	1895	1786	2358	2825	1	1	1	1
	180	1546	1691	1553	1128	1	1	1	1
	180	1467	2764	4531	1435	1	0	1	1
	180	1694	1289	3666	2635	1	1	1	1
	180	1470	2094	1851	1842	1	1	1	1
	180	2194	873	2624	2033	1	1	1	1
	240	2502	3558	1974	3980	1	1	1	1
	240	2519	1442	4491	1447	1	1	1	1
	240	1772	3328	2123	2630	1	1	1	1
	240	1946	2547	1545	2126	1	1	1	1
	240	3412	1010	2304	1175	1	1	1	0
	240	3264	2383	1506	2001	1	1	1	1
	300	4714	2932	5615	2024	1	1	1	1
	300	1995	2288	1838	2596	1	1	1	1
	300	2211	2397	1015	1360	1	1	1	1
	300	1796	2791	2328	1594	1	1	1	1
	300	6973	5653	3246	1966	1	1	1	1
	300	2302	1690	2052	3540	1	1	1	1
sub005	0	1555	857	7504	1119	0	1	0	1
	0	4025	1071	1070	4561	0	1	0	0
	0	2743	931	1834	1086	0	1	0	1
	0	570	1276	1259	635	0	1	0	0
	0	547	2198	1679	4299	1	0	0	1
	0	3939	2811	5435	2668	1	0	1	0
	60	5262	1202	2640	4126	1	1	1	1
	60	3964	5583	2511	1775	0	1	1	0
	60	8000	614	1820	1905	0	0	0	1
	60	1212	1543	1706	2300	1	1	1	1
	60	1309	5260	2629	1109	1	1	1	1
	60	623	1632	751	1671	0	1	1	1
	120	3986	973	4337	992	1	1	1	0
	120	484	1434	1413	1531	1	1	1	1
	120	8000	4138	2756	2987	0	0	1	1
	120	2646	1297	1325	2877	1	1	0	1
	120	937	1941	1094	848	1	1	0	1
	120	3791	511	2406	2112	0	0	1	0
	180	1180	2065	3571	658	0	0	0	1
	180	1494	5303	919	3861	1	1	1	0
	180	709	760	1213	1765	1	1	1	0
	180	2247	2419	1001	6402	0	1	0	1
	180	2072	1534	966	2545	1	0	0	1
	180	2697	2623	2238	671	1	1	0	1
	240	3474	731	2052	2255	1	0	0	0
	240	673	8000	447	2168	0	0	0	1
	240	3743	589	4791	1685	0	0	0	0
	240	1641	944	6675	1556	0	1	0	0
	240	2917	1851	1745	2071	0	0	0	0
	240	856	1261	6730	5681	0	0	0	1
	300	812	4046	1253	6330	0	0	1	1
	300	843	2917	2240	1085	1	0	0	0
	300	4096	5075	2380	3145	1	0	1	0
	300	759	870	1707	1154	0	0	0	0
	300	7456	2658	1101	2496	0	0	0	1
	300	1252	720	4686	623	0	1	0	0
sub006	0	3203	1398	1459	2118	0	0	1	1
	0	3619	2427	2358	3621	1	0	1	1
	0	4972	8000	2280	2128	1	0	1	1
	0	3040	2160	1903	1119	1	0	1	1
	0	5368	1669	1750	1984	1	0	1	1
	0	5626	3375	3105	1469	1	0	1	1
	60	8000	5764	1444	2970	0	0	1	1
	60	330	4649	2753	2065	0	1	1	1
	60	3087	3825	1946	1723	1	1	1	1
	60	2783	3219	2501	1222	1	1	1	1
	60	1310	5886	1646	1432	1	1	1	1
	60	1453	6523	2966	1807	1	1	1	1
	120	3336	3571	4791	3673	0	0	1	1
	120	5006	2116	1889	1794	0	1	1	1
	120	3735	2600	2407	2880	1	1	1	1
	120	1992	7842	1364	1714	1	1	1	1
	120	3684	2241	2737	3280	1	1	1	1
	120	1779	2363	2682	3238	1	1	1	1
	180	8000	2228	4692	4781	0	1	0	0
	180	4022	4170	5572	4506	1	1	1	0
	180	4050	6731	3840	1569	1	1	1	0
	180	2725	2935	5049	4165	1	1	1	0
	180	6911	4348	5390	7052	1	1	1	1
	180	1785	6540	3722	4418	1	1	1	1
	240	4848	5370	3658	7780	0	0	0	0
	240	1652	1434	8000	1815	0	0	0	0
	240	1237	1624	2242	1215	0	0	1	0
	240	1563	8000	1822	2056	0	0	1	0
	240	4768	5706	2628	3519	1	1	1	1
	240	7008	4415	5560	1483	1	1	1	1
	300	3202	5867	1654	1678	0	0	0	1
	300	3158	2742	8000	2716	0	0	0	1
	300	3679	2199	894	3284	0	0	0	1
	300	1482	2056	3384	4345	0	0	1	1
	300	8000	2017	1962	1646	0	0	1	1
	300	3230	4848	5063	4742	1	1	1	1
sub007	0	1284	1374	991	1275	0	1	1	1
	0	1554	3941	1641	1624	1	1	1	1
	0	1659	2363	881	997	1	1	1	1
	0	1967	1561	1050	2208	1	1	1	1
	0	1494	2083	1180	960	1	1	1	1
	0	1177	2952	1787	1007	1	1	1	1
	60	2280	1336	883	871	1	0	1	1
	60	1377	1369	1014	999	1	1	1	1
	60	1944	1709	931	942	1	1	1	1
	60	1620	1294	1251	1026	1	1	1	1
	60	3404	1771	1108	959	1	1	1	1
	60	2399	1233	1513	930	1	1	1	1
	120	1643	3619	1477	1994	1	0	1	1
	120	1638	1657	2310	1019	1	0	1	1
	120	2777	1699	1385	1492	1	1	1	1
	120	1730	1129	1057	1114	1	1	1	1
	120	1261	966	1411	1024	1	1	1	1
	120	2477	1374	1192	1262	1	1	1	1
	180	1514	1810	3144	1705	1	1	1	1
	180	2233	1396	1433	1283	1	1	1	1
	180	1379	1616	1551	2135	1	1	1	1
	180	1290	2434	2021	4176	1	1	1	1
	180	1504	1290	2371	1170	1	1	1	1
	180	1873	2398	2547	1051	1	1	1	1
	240	1744	1682	1215	8000	1	1	1	0
	240	3759	1647	2979	1667	1	1	1	1
	240	2969	3366	1848	1929	1	1	1	1
	240	1527	1679	1670	1882	1	1	1	1
	240	3105	1453	1385	3126	1	1	1	1
	240	1950	2793	1533	1351	1	1	1	1
	300	2804	2363	3282	2511	1	1	1	1
	300	2086	1990	1180	1251	1	1	1	1
	300	1779	1339	1238	2449	1	1	1	1
	300	2986	3189	1429	1573	1	1	1	1
	300	1105	1988	1335	896	1	1	1	1
	300	1482	1654	1094	1549	1	1	1	1
sub008	0	2159	1499	1192	1139	1	0	1	1
	0	2491	1489	1780	1085	1	1	1	1
	0	2411	1263	1251	846	1	1	1	1
	0	2166	2351	1106	1045	1	1	1	1
	0	1960	3717	2072	1055	1	1	1	1
	0	1877	1134	1450	1069	1	1	1	1
	60	1783	1168	1013	1001	1	1	1	1
	60	1844	1141	1623	1079	1	1	1	1
	60	2283	1978	1148	1160	1	1	1	1
	60	2153	997	1052	1698	1	1	1	1
	60	1641	1410	1236	1408	1	1	1	1
	60	1890	2093	1461	967	1	1	1	1
	120	2221	1581	1515	1795	1	1	1	1
	120	1532	2651	1993	1399	1	1	1	1
	120	2553	2106	1313	970	1	1	1	1
	120	2454	1512	2144	2862	1	1	1	1
	120	3807	1213	1205	1396	1	1	1	1
	120	3833	1851	2675	1542	1	1	1	1
	180	3100	1699	3235	2736	0	1	1	1
	180	1759	1317	3010	3321	1	1	1	1
	180	2132	1416	4015	1743	1	1	1	1
	180	1449	1115	2853	1805	1	1	1	1
	180	3813	2173	4091	1435	1	1	1	1
	180	1937	2084	2870	1438	1	1	1	1
	240	6557	3688	5366	2332	0	1	1	1
	240	3006	2454	3397	6093	1	1	1	1
	240	2787	2279	1968	4503	1	1	1	1
	240	2831	6860	2357	3099	1	1	1	1
	240	4437	2780	3191	3295	1	1	1	1
	240	2011	4878	1946	3891	1	1	1	1
	300	4133	3834	1476	1847	0	0	1	1
	300	2153	4144	2761	2673	1	1	1	1
	300	4341	1887	5186	2233	1	1	1	1
	300	2018	1764	1948	2896	1	1	1	1
	300	2152	2535	1599	1878	1	1	1	1
	300	2767	3756	1895	2445	1	1	1	1
sub028	0	1421	2753	3592	1164	0	1	1	1
	0	925	1012	3876	989	0	0	1	1
	0	1033	1700	816	4459	0	0	1	1
	0	1323	2907	2815	1093	0	0	1	0
	0	942	1450	1525	1195	0	0	1	1
	0	843	3381	4202	2709	0	1	0	1
	60	1948	4465	1418	1489	1	1	1	1
	60	1363	3302	1240	1618	0	1	1	1
	60	1183	2703	1639	1748	1	1	1	1
	60	1671	1401	1729	1896	0	1	1	1
	60	1048	1228	1475	965	1	1	1	1
	60	2088	1975	1651	1062	1	1	1	1
	120	3634	2729	1482	543	0	1	1	1
	120	1256	4819	767	2192	0	1	1	1
	120	1053	959	918	6266	0	0	1	0
	120	1380	2331	3512	1426	0	0	1	1
	120	2889	1929	1532	1115	1	1	1	1
	120	1067	4208	1646	1181	1	1	1	1
	180	6135	1516	1581	3192	1	1	0	1
	180	4518	3189	3380	1917	1	1	1	0
	180	2720	1831	2569	2153	0	1	0	1
	180	3708	3082	2227	1271	1	1	1	1
	180	2267	4091	4428	5291	1	1	0	1
	180	3554	2418	915	2001	0	1	0	0
	240	8000	3184	2638	1681	0	0	1	1
	240	1870	964	1356	802	0	0	0	0
	240	1521	1374	4925	1473	0	1	1	0
	240	1479	1525	2927	1410	0	0	1	0
	240	1537	3527	1838	5888	0	1	0	1
	240	1422	1373	1727	1546	0	0	0	0
	300	2543	3759	872	2147	1	1	1	0
	300	1286	939	1452	1722	0	0	1	0
	300	1583	1597	1853	1379	0	0	1	1
	300	6953	917	691	684	0	0	0	1
	300	3860	3865	1069	900	1	1	0	1
	300	693	3400	2600	1243	0	0	1	1
sub029	0	890	859	1254	1682	0	1	1	1
	0	2507	1477	1868	1702	1	1	1	1
	0	3047	4636	1532	1028	0	1	1	1
	0	3242	2825	1531	1179	1	0	1	1
	0	1830	4558	587	2719	1	1	0	1
	0	3949	2818	1441	996	0	1	1	1
	60	926	1921	1297	2883	1	1	1	0
	60	3202	1330	3638	929	0	0	1	1
	60	3797	1797	1213	1691	1	1	1	1
	60	1808	3411	1729	2512	1	1	1	1
	60	3254	2600	1102	767	1	1	1	1
	60	3762	3723	4369	2233	0	0	0	1
	120	3750	2093	2116	2154	1	1	1	1
	120	5425	3657	5976	1608	0	0	1	1
	120	698	2364	1748	1292	1	1	0	1
	120	1700	1499	1754	5146	0	1	1	1
	120	3768	5720	2176	1057	1	0	1	0
	120	4094	4804	1710	1660	1	1	1	1
	180	5810	1857	1851	4626	1	1	0	0
	180	4300	1856	5209	1567	1	1	1	1
	180	3481	5285	3874	1688	1	1	0	1
	180	8000	1761	2651	2744	0	1	0	1
	180	1819	4515	7270	496	1	1	0	0
	180	961	2467	3477	6198	1	0	1	1
	240	3513	4666	1894	2298	1	1	0	1
	240	2566	2751	1348	2302	1	1	0	1
	240	2097	1410	1884	2603	1	0	1	1
	240	2599	3033	2222	4336	1	1	1	1
	240	4786	3831	1338	3211	1	1	1	1
	240	2883	2849	2288	3961	1	1	1	0
	300	4412	2490	1733	3116	1	1	1	1
	300	1360	5209	3144	1815	1	1	1	1
	300	3313	7197	4758	1447	1	1	1	1
	300	3870	2513	8000	2159	1	1	0	1
	300	2596	1190	3447	7029	0	1	1	1
	300	2482	4260	2449	2972	1	1	1	1
sub030	0	1477	3189	1550	1160	1	1	1	1
	0	2171	2291	1218	1489	1	1	1	1
	0	1894	2177	1678	1527	1	0	1	1
	0	3341	3074	1433	1233	1	1	1	1
	0	1833	2242	2594	874	1	1	1	1
	0	3446	2349	1278	2523	1	1	1	1
	60	3085	2188	1371	1516	1	1	1	1
	60	1497	1211	2877	1432	1	1	1	0
	60	1958	1206	1254	1809	1	1	1	1
	60	2126	2355	2147	1290	1	1	1	1
	60	2566	2413	1314	1392	1	0	1	1
	60	1034	3383	1149	2054	1	1	1	1
	120	5015	1310	1604	2290	1	1	1	1
	120	1828	1963	4287	3194	1	1	0	1
	120	1338	1171	1762	1421	1	1	0	1
	120	849	1624	1648	2078	1	1	1	1
	120	1473	2158	2119	2865	1	1	1	1
	120	1605	1329	3521	1363	1	1	1	1
	180	1950	1398	2838	2592	1	1	1	1
	180	1000	4468	3798	2665	1	1	1	1
	180	1535	3508	8000	2899	1	1	0	1
	180	459	1753	4733	1234	0	1	1	1
	180	1574	1912	5937	1568	1	1	0	1
	180	2841	1182	5511	2259	1	1	1	1
	240	3533	1952	2187	2436	1	1	1	1
	240	2958	2696	3148	2397	1	1	1	1
	240	1979	3751	2465	1844	1	1	1	1
	240	3082	4507	4046	3176	1	1	1	1
	240	5511	8000	5408	7921	1	0	1	1
	240	2162	2107	3126	3234	1	1	1	1
	300	2146	2535	2360	3277	1	1	1	0
	300	5092	2840	1363	1666	1	1	1	1
	300	2543	1879	1097	1626	1	1	1	1
	300	3011	1836	1535	1347	1	1	1	1
	300	2729	3123	931	5715	1	1	1	1
	300	1508	3279	3231	2201	1	1	1	1
sub031	0	914	3799	2704	2594	0	0	1	1
	0	3374	4695	3871	1648	1	1	0	1
	0	2691	2064	1478	1252	1	1	1	1
	0	5938	1817	2018	2639	1	0	1	1
	0	4451	5664	1769	3072	1	1	1	1
	0	3702	2395	1601	4610	1	0	1	1
	60	1373	1270	1479	797	1	1	1	1
	60	1265	1216	3222	1228	1	1	1	1
	60	973	3343	4225	889	0	1	0	1
	60	7885	1501	1518	2909	1	1	1	1
	60	6619	1956	1231	4037	1	1	1	1
	60	4734	701	2360	814	1	1	1	1
	120	1204	1165	3490	1521	1	1	1	1
	120	1789	1255	1447	1509	1	1	0	1
	120	1441	2753	2485	3422	1	1	1	1
	120	3183	2347	2677	4464	1	1	0	1
	120	1157	1204	1063	2775	1	0	0	1
	120	2514	3727	2824	1250	1	1	1	1
	180	1494	3301	4159	3422	0	1	0	1
	180	2485	4443	4790	1650	0	0	1	1
	180	2592	6915	1137	5210	1	1	0	1
	180	1660	4788	5509	1213	0	1	0	0
	180	5872	2026	6137	8000	1	1	1	0
	180	4212	4759	4166	1373	1	0	1	1
	240	2550	1674	3253	4092	0	1	1	0
	240	1480	4010	2525	3954	0	1	1	0
	240	3329	1443	2923	4845	1	0	1	0
	240	4482	2250	2750	2218	1	0	0	0
	240	1794	1116	2822	8000	0	0	1	0
	240	5587	4635	8000	3171	1	1	0	0
	300	2830	895	2669	2882	1	0	0	0
	300	4426	2147	2341	7066	1	0	0	1
	300	1328	4169	2372	1719	0	0	1	1
	300	2877	1606	2236	1397	0	0	1	0
	300	1175	623	2733	1658	0	0	1	0
	300	1558	1343	2297	3204	1	0	1	1
sub032	0	8001	1505	1251	3262	0	1	1	1
	0	2359	5623	3022	983	1	1	1	1
	0	267	3875	1920	1590	1	1	1	1
	0	2912	1313	837	1292	1	1	1	1
	0	4820	1881	1702	981	1	0	1	1
	0	3615	5597	854	2276	0	1	1	1
	60	4774	1119	2124	1408	1	1	1	1
	60	6151	3237	1826	972	1	1	1	1
	60	1237	1552	2528	896	1	0	1	1
	60	2538	2667	1128	4112	1	1	1	1
	60	4259	2548	1057	742	1	1	1	1
	60	1598	2499	1021	1749	0	1	1	1
	120	6610	4356	1456	1404	1	1	1	1
	120	4336	2325	2758	2370	1	0	1	1
	120	2583	3442	1361	2240	1	1	1	0
	120	2248	7419	1348	1814	1	1	1	1
	120	5346	1644	1087	1889	1	1	1	1
	120	8000	7229	1891	640	0	1	1	0
	180	3847	2454	3590	4748	1	1	1	1
	180	2671	1639	5751	2168	0	1	1	1
	180	1929	3880	1456	238	0	1	1	1
	180	6636	4583	4205	2802	0	0	1	1
	180	2540	4414	6544	2850	0	1	1	0
	180	1458	3927	2950	4591	0	1	1	1
	240	2377	1010	1932	6945	1	0	1	1
	240	8000	4281	1190	7067	0	1	1	1
	240	7525	3983	1990	1767	1	1	1	1
	240	1963	680	5610	4721	1	1	1	0
	240	1376	2760	2523	2686	1	1	1	1
	240	5862	3310	3939	2625	1	1	1	1
	300	5534	5412	2462	2629	1	1	1	1
	300	4440	1410	1909	2591	1	1	1	0
	300	8000	1717	1208	5409	0	1	1	1
	300	8000	4693	1356	1051	0	1	1	1
	300	2636	5882	1858	1482	1	1	1	1
	300	1198	1396	1131	2406	1	1	1	1
sub033	0	2201	2567	1266	986	1	1	1	1
	0	1955	3175	1500	1334	1	0	1	1
	0	2968	2301	1232	904	1	1	1	1
	0	2303	2042	1457	1105	1	1	1	1
	0	3033	3460	1662	2304	1	1	1	1
	0	2307	3680	1082	919	1	1	1	1
	60	2074	1570	1864	962	1	1	1	1
	60	1401	1352	933	1052	1	1	1	1
	60	1930	1108	1208	1104	1	1	1	1
	60	2395	1360	1766	1674	1	1	1	1
	60	1983	900	1117	929	1	1	1	1
	60	1959	1662	1873	1069	1	1	1	1
	120	2147	1862	2571	1829	1	1	1	1
	120	2919	1149	2319	1669	1	1	1	1
	120	1671	2451	1872	1583	1	1	1	1
	120	1286	1057	2218	1526	1	1	1	1
	120	1099	1673	2760	1819	1	1	1	1
	120	1915	2071	1426	1434	1	1	0	1
	180	1070	1657	2959	1757	1	1	1	1
	180	2337	1849	2293	1545	1	1	1	1
	180	2380	2086	2671	845	1	1	1	1
	180	2540	2272	2215	1341	1	1	1	1
	180	1921	1831	2478	1713	1	1	1	1
	180	2494	2369	5426	1434	1	1	1	1
	240	4078	3052	2527	2504	1	1	1	1
	240	1943	2311	1354	1457	1	1	1	1
	240	2482	4537	2009	3232	1	1	1	1
	240	3870	8000	1896	2128	1	0	1	1
	240	1518	4101	2197	2458	1	1	1	1
	240	2274	4227	1840	3966	1	1	1	1
	300	2064	1548	2385	3813	1	1	1	1
	300	2157	6513	3046	977	1	1	1	1
	300	1343	1684	1106	2315	0	1	1	1
	300	4410	1946	2245	1608	1	1	1	1
	300	2178	1724	1858	2035	0	0	1	1
	300	2892	2850	1701	1713	1	1	1	1
sub034	0	4005	4872	2905	1695	1	1	1	1
	0	3513	3813	1941	3061	1	1	1	1
	0	4919	1738	4950	1630	1	1	1	1
	0	3042	4970	1539	1191	1	1	1	1
	0	2366	8000	1282	1614	1	0	1	1
	0	4462	2533	2047	1706	1	1	1	1
	60	3849	4226	2009	1190	1	1	1	1
	60	5195	4084	1513	1452	0	1	1	1
	60	2090	2000	3602	1478	1	1	1	1
	60	2124	1070	2423	1007	1	1	1	1
	60	1873	2626	1946	1717	1	0	1	1
	60	3064	4579	935	1048	1	1	1	1
	120	1615	1583	2116	1555	1	1	1	1
	120	1323	1037	1405	2000	1	1	0	1
	120	1636	1174	4349	3182	1	1	1	1
	120	1361	3814	1719	3594	1	1	0	1
	120	1384	3566	2093	2838	0	1	1	1
	120	2260	1874	1485	5778	1	1	1	1
	180	8000	8000	6899	1298	0	0	0	1
	180	2192	5845	2660	1954	1	1	1	1
	180	1749	3300	4650	5308	1	1	1	1
	180	2629	1136	5814	2204	1	1	0	1
	180	2529	5961	2344	1551	1	1	1	1
	180	2260	2466	4742	1606	1	0	1	1
	240	2549	2955	1475	2380	1	1	1	1
	240	6527	2892	2364	2303	1	1	1	1
	240	8000	8000	7999	3469	0	0	1	1
	240	4327	1806	2190	2262	1	1	1	1
	240	7091	2235	1476	3267	1	1	1	1
	240	550	4848	5916	3362	0	1	1	1
	300	4718	2789	969	2235	1	1	1	1
	300	3975	7577	1906	3257	1	1	1	1
	300	2481	2766	1469	3107	1	1	1	1
	300	2557	1850	1868	1250	1	1	1	1
	300	8000	4847	2287	860	0	1	1	1
	300	2353	5556	2780	1360	1	1	1	0
sub035	0	1494	2132	1409	1861	1	1	1	1
	0	3717	875	1232	1143	0	1	1	1
	0	2992	3001	1790	1991	1	1	1	1
	0	2266	1757	1380	1211	1	1	1	1
	0	3315	2133	1490	1546	1	0	1	1
	0	1483	3630	1858	978	1	1	1	1
	60	2010	2300	1566	847	1	1	1	1
	60	1158	1299	1893	1707	1	1	1	1
	60	2478	1289	831	2531	1	1	1	1
	60	1658	1260	1725	1175	1	1	0	1
	60	1654	2055	1173	1240	1	1	1	1
	60	2005	1111	1287	1027	1	1	1	1
	120	1846	1105	2936	3094	1	1	1	1
	120	1322	2260	1828	2149	1	0	1	1
	120	1185	1603	4096	1403	1	1	1	1
	120	2820	2787	2444	963	1	1	1	1
	120	1458	2150	2684	1729	1	1	1	1
	120	1997	1280	2399	2925	1	1	1	1
	180	1595	2535	6633	1264	1	1	1	1
	180	1855	1893	2112	1973	1	1	1	1
	180	1238	2097	1847	2340	1	1	1	1
	180	2404	2302	4684	1254	1	1	1	1
	180	1832	2659	5131	1508	1	1	1	1
	180	5135	3823	2904	2391	1	1	1	1
	240	4355	7826	1688	5463	1	1	1	1
	240	5186	7924	1512	2298	1	0	1	1
	240	1116	2888	3320	1025	1	1	1	1
	240	3286	1730	2910	1655	1	1	1	1
	240	2966	4658	1602	2005	1	1	1	1
	240	3317	2167	1293	2181	1	1	1	1
	300	3574	1408	1738	2628	1	1	0	1
	300	1723	2367	1321	2388	1	1	1	1
	300	1896	2184	1043	1217	1	1	1	1
	300	1208	2104	1580	2905	0	1	1	1
	300	1779	1125	1311	1304	1	1	1	1
	300	2856	2910	1083	2220	1	1	1	1
sub036	0	3166	4600	3274	1790	1	1	1	0
	0	4002	3375	6499	3022	1	1	1	0
	0	3716	5140	2706	3203	1	1	1	1
	0	6296	5068	2647	4238	1	1	1	1
	0	4845	7418	5129	7941	1	1	1	1
	0	5655	4145	6027	2285	0	1	1	1
	60	6771	3023	2273	2054	1	1	1	1
	60	7031	3053	4493	6072	1	1	1	1
	60	5713	8000	3088	3925	1	0	1	1
	60	3958	5116	2392	5364	0	1	1	1
	60	3713	4515	2545	5493	1	1	1	1
	60	5213	2255	3165	3143	1	1	1	1
	120	2816	3576	7390	8000	1	1	1	0
	120	5087	3703	4856	3564	1	1	0	1
	120	2794	4097	2461	3116	1	1	1	1
	120	2346	4528	3652	8000	1	1	1	0
	120	2778	7315	5881	5611	1	1	1	1
	120	4990	3893	3731	4127	1	1	1	1
	180	2990	8000	7726	2409	0	0	1	1
	180	4952	6011	6747	7343	1	1	1	0
	180	2531	8000	7445	7102	1	0	1	1
	180	3579	4118	4608	7285	1	0	1	1
	180	5578	7839	3352	1923	1	1	1	1
	180	5722	7397	4517	3967	1	1	1	1
	240	5405	2861	3417	5939	1	1	0	1
	240	5801	4372	3664	8000	1	1	1	0
	240	4876	3655	6463	2659	1	1	1	0
	240	3411	7618	7243	3586	1	1	1	1
	240	7936	4926	4066	4271	1	1	0	1
	240	5254	4062	3732	6520	1	1	0	1
	300	2321	3391	3411	5738	0	1	1	1
	300	4248	5907	4300	4134	1	1	0	1
	300	3445	4712	3964	4388	0	1	1	1
	300	7570	3850	4194	2629	0	1	1	0
	300	4929	7623	3836	3616	1	1	1	1
	300	6502	3282	5044	7944	1	1	1	0
sub037	0	2935	1596	832	1032	1	0	1	1
	0	1901	474	871	1607	1	0	1	0
	0	834	2011	797	1275	1	1	1	1
	0	1500	1270	1055	659	1	0	0	0
	0	2618	1421	944	1289	1	0	1	0
	0	1128	1136	1043	1481	0	0	1	1
	60	700	699	1286	655	1	1	1	1
	60	363	399	881	1504	0	1	1	1
	60	1225	2348	1344	1057	0	1	1	0
	60	1012	983	974	1240	0	0	1	0
	60	1140	523	1283	426	1	0	1	0
	60	2174	870	844	800	0	0	1	1
	120	595	778	499	1028	1	1	1	1
	120	871	2714	2387	393	0	0	1	1
	120	1843	1378	4901	213	0	1	1	1
	120	373	677	1016	807	1	0	1	0
	120	1284	483	1764	1601	1	1	1	1
	120	794	758	1046	2559	1	1	1	1
	180	937	1153	1088	718	0	0	0	0
	180	948	1124	1643	1580	0	0	1	0
	180	392	938	1281	1771	0	1	1	0
	180	1285	1580	1423	1444	0	0	1	1
	180	646	689	699	1065	0	1	1	0
	180	417	378	997	1092	0	0	0	0
	240	1805	1178	1071	1979	1	0	1	0
	240	694	1037	1757	1097	0	0	0	1
	240	401	535	1017	883	0	1	1	0
	240	944	1822	370	1166	0	1	0	0
	240	1443	1058	1111	1514	1	0	0	0
	240	1227	487	793	1363	1	1	0	0
	300	1868	2260	938	992	1	0	1	1
	300	1704	476	416	411	1	1	1	0
	300	5353	1202	606	1274	0	0	0	1
	300	1432	1074	1192	989	0	0	0	1
	300	1418	812	462	1324	1	1	1	0
	300	1756	2027	547	1993	0	0	1	0
sub038	0	2354	4248	2794	1136	1	1	1	1
	0	2532	5715	2624	986	1	1	1	1
	0	2454	3154	3424	1048	1	1	1	1
	0	3351	6975	1711	4748	1	1	1	1
	0	4074	3702	2107	4243	1	0	1	1
	0	3179	2783	2686	3156	1	1	1	1
	60	7854	4454	3514	1564	1	1	1	0
	60	2671	5891	2491	1730	1	1	1	1
	60	8000	5212	2922	1916	0	1	1	1
	60	5048	7920	7816	3207	0	1	1	1
	60	2276	2143	5945	2539	1	1	1	1
	60	4791	5102	1570	1266	1	1	1	1
	120	3307	1844	5898	725	1	1	1	0
	120	8000	8000	3127	1744	0	0	1	1
	120	6066	5188	2859	5320	1	1	1	1
	120	7063	2610	8000	1248	1	0	0	1
	120	2780	2531	4713	5163	1	1	1	1
	120	2912	4914	1873	6135	1	1	1	1
	180	4442	4557	2040	4542	1	0	0	1
	180	3379	1915	6996	1798	1	1	1	1
	180	1665	3642	5211	5174	1	1	1	1
	180	2985	2454	8000	3315	1	1	0	1
	180	1732	1859	4922	2499	1	1	1	1
	180	2525	3806	3857	6534	1	1	1	1
	240	6975	5018	3928	8000	1	1	1	0
	240	8000	6777	1763	5619	0	1	1	1
	240	8000	6188	8000	2782	0	1	0	1
	240	4702	1500	1966	3817	1	1	1	1
	240	4787	3445	8000	5027	1	1	0	1
	240	2627	8000	2925	8000	1	0	1	0
	300	3695	4254	1989	3137	1	1	1	1
	300	2746	4145	1802	1755	1	1	1	1
	300	3518	2786	1611	4722	1	1	1	1
	300	2486	3509	3590	3334	1	1	1	1
	300	4706	2083	2344	1288	1	1	1	1
	300	2749	3113	3263	4865	1	1	1	1
sub053	0	2801	7467	3774	2797	1	1	1	1
	0	2650	8000	2616	7953	0	0	1	1
	0	4312	5014	4236	4833	1	1	1	1
	0	5007	3195	4005	1777	0	1	1	0
	0	2518	5418	1806	4592	1	1	1	1
	0	3636	4740	2146	1994	1	1	1	1
	60	2051	3985	2401	1906	0	0	1	1
	60	4524	3118	2829	1708	1	1	1	1
	60	1672	3345	2705	2756	1	0	1	1
	60	2306	3595	1626	3072	1	1	1	1
	60	2836	2929	3187	2783	1	0	1	1
	60	3330	5402	5537	2215	0	1	1	1
	120	3271	8000	4110	2630	1	0	1	1
	120	7849	2937	3846	2550	1	1	1	1
	120	1937	2676	2249	1703	1	1	1	1
	120	2390	2193	3547	3124	1	1	1	1
	120	1929	1999	6983	8000	1	1	1	0
	120	2146	3784	2052	4046	1	1	1	0
	180	5796	4541	4940	2603	1	1	1	1
	180	4168	2412	6417	2235	1	1	1	1
	180	2266	2803	4204	4151	0	1	1	1
	180	2377	3276	3554	5939	1	1	1	1
	180	2579	2412	3576	4742	1	1	1	1
	180	3417	3835	4384	3842	1	1	1	1
	240	1983	3838	3978	6378	0	1	1	1
	240	8000	3464	4974	4071	0	0	1	0
	240	6816	4667	3723	6432	1	1	1	1
	240	2233	2534	3904	8000	0	0	1	0
	240	3336	6282	5340	8000	0	0	1	0
	240	2325	8000	4816	5116	1	0	0	1
	300	2488	2816	4579	2335	0	1	1	1
	300	2852	2888	1934	3256	1	1	1	1
	300	2985	1841	3606	4038	1	0	1	1
	300	6300	3448	6979	3103	1	1	1	1
	300	3493	8000	5268	3510	1	0	1	1
	300	1460	1851	2448	3234	0	0	1	1
sub054	0	5221	4625	3025	3450	1	1	1	1
	0	4605	3164	5082	1854	0	1	1	1
	0	1533	6114	2820	2548	0	1	1	1
	0	7496	4736	2417	2689	1	1	1	1
	0	3661	3704	2797	1678	1	1	1	1
	0	2457	1689	1519	3082	1	0	1	1
	60	6087	2415	2333	2427	1	0	1	1
	60	8000	3055	8000	1072	0	0	0	1
	60	3669	2419	3829	1958	1	1	1	1
	60	4354	1428	7704	3426	1	0	1	1
	60	3923	1746	6030	4353	1	1	1	0
	60	1500	1631	1568	2053	1	0	1	1
	120	3592	1769	2151	4086	1	1	1	1
	120	798	5499	3409	2962	1	1	1	1
	120	3909	8000	1838	2382	0	0	1	1
	120	3984	2972	1984	1701	1	0	1	1
	120	3903	2877	5781	3781	1	1	1	1
	120	2447	3042	2425	1608	1	1	1	1
	180	6243	2207	5173	7832	1	1	0	1
	180	140	1454	7706	3567	1	1	0	1
	180	1949	2496	8000	1201	0	1	0	1
	180	8000	2587	8000	7240	0	1	0	0
	180	1355	8000	2160	6226	1	0	0	1
	180	2074	2787	3872	5128	1	1	0	0
	240	4578	4935	2165	73	0	0	1	1
	240	5449	1965	2030	3783	0	0	1	0
	240	1497	5904	8000	3340	1	1	0	0
	240	3605	3532	6524	4304	0	1	1	0
	240	1338	1741	2275	3557	0	0	0	0
	240	1609	4210	8000	3885	0	0	0	0
	300	4685	8000	1453	1172	0	0	0	1
	300	6506	5981	2306	2402	0	1	1	1
	300	3323	5356	6741	2157	1	1	1	1
	300	5571	4205	2155	5053	1	1	1	1
	300	8000	2196	1370	7729	0	1	0	1
	300	2027	4813	2160	3296	0	0	1	1
sub055	0	3142	4143	2339	1147	1	1	1	1
	0	4404	2518	1512	969	1	1	1	1
	0	925	1101	1118	831	1	1	1	0
	0	1212	1523	1066	1800	1	1	1	1
	0	1739	378	1024	1418	1	1	1	0
	0	1726	2392	2542	1731	1	1	1	1
	60	1654	2474	2426	2353	1	0	1	1
	60	1349	3301	1192	1448	1	1	1	1
	60	1412	1659	990	1478	1	1	1	1
	60	1660	3334	1254	1944	1	1	1	1
	60	1744	1197	1848	781	1	1	1	0
	60	2089	4238	2718	2952	1	1	1	1
	120	1998	2903	2915	1979	1	1	1	1
	120	1740	311	2460	2144	1	1	1	1
	120	1267	3183	1800	2251	1	0	1	1
	120	2281	1491	1871	1146	1	0	1	0
	120	1537	1466	3593	3165	1	1	1	1
	120	1281	1874	1385	1891	1	1	1	1
	180	2140	4208	3132	3377	1	1	1	1
	180	2639	5706	2340	3583	1	1	1	1
	180	4699	2187	3353	3996	0	1	1	0
	180	4771	2285	2549	1180	1	1	1	0
	180	1453	1559	2008	2695	1	0	0	1
	180	2313	2371	2024	5821	1	1	0	1
	240	2636	3132	2033	1692	1	1	1	1
	240	2031	8000	2310	1932	1	0	1	1
	240	1958	2083	2350	1737	1	1	0	1
	240	4133	1655	686	2531	1	1	1	1
	240	254	2284	1059	832	1	1	1	0
	240	4963	2152	2770	2563	1	1	1	1
	300	3361	4675	2071	1775	1	1	1	1
	300	3050	4561	2390	2264	1	1	1	1
	300	2972	2200	2377	1263	1	1	1	1
	300	66	2480	445	2356	1	1	0	1
	300	893	4235	1338	41	0	1	1	1
	300	1597	2048	1309	1163	1	1	1	0
sub056	0	1360	2074	3586	2012	1	1	1	0
	0	1572	2314	3496	2330	1	1	1	1
	0	1469	2382	1149	1435	1	1	1	0
	0	1459	2094	1234	1482	1	0	1	1
	0	4497	1893	1568	1340	1	0	1	1
	0	1347	3278	1471	2437	1	1	1	1
	60	1729	2015	987	2615	1	0	1	1
	60	1109	849	1352	921	1	1	1	1
	60	1894	1767	1017	1109	1	1	1	1
	60	1463	1253	1186	1528	1	1	1	1
	60	4649	1951	1211	784	1	1	1	1
	60	1357	1639	1192	1703	1	1	1	1
	120	1963	962	1946	1535	1	1	1	0
	120	2151	2462	1461	2417	1	1	1	1
	120	2542	1212	2725	4506	1	1	1	1
	120	1452	1696	1749	1852	1	1	1	0
	120	1791	1362	1578	1214	0	1	1	1
	120	1222	1655	1742	1611	1	1	1	1
	180	975	2016	4474	1825	0	0	1	1
	180	2511	2280	2099	1370	1	0	1	1
	180	1782	1978	7134	1118	1	1	1	0
	180	2341	1738	3701	1785	1	1	1	1
	180	1463	3006	3150	2603	1	1	1	0
	180	2360	995	3904	2829	0	1	1	1
	240	1780	2562	3806	4584	0	1	1	0
	240	5007	1561	3116	6872	0	0	1	0
	240	1945	1599	2593	3059	1	1	1	0
	240	1161	4212	1703	1329	0	0	1	1
	240	3172	6482	3327	6134	1	1	1	0
	240	3198	1417	1523	4067	1	0	1	0
	300	1855	2663	1626	2867	1	1	1	0
	300	1596	3035	2289	1950	1	1	1	1
	300	1520	2102	1564	2321	1	1	1	1
	300	1834	1709	1512	2000	1	0	1	1
	300	2911	1385	2080	1402	1	1	1	0
	300	1365	2455	1438	2447	1	1	1	1
sub057	0	1172	724	3946	838	1	1	0	1
	0	746	686	437	2038	0	0	0	0
	0	889	985	2884	1256	0	1	0	1
	0	944	978	381	588	0	1	0	1
	0	1026	501	1596	1724	1	1	1	1
	0	362	907	3306	2352	1	1	1	1
	60	5128	811	2413	2678	1	1	0	1
	60	3222	1482	1682	4015	1	1	0	0
	60	1664	452	2192	5005	1	0	0	1
	60	860	682	2368	891	1	0	1	0
	60	768	889	1744	6244	1	1	1	1
	60	8207	2096	2573	1115	0	0	1	1
	120	667	3141	4435	2132	1	1	1	0
	120	60	3888	2094	951	1	1	1	1
	120	5838	430	506	3628	1	0	0	0
	120	553	1050	1174	4452	1	1	1	1
	120	750	415	1388	529	1	0	0	1
	120	735	543	8000	667	0	1	0	1
	180	1377	2428	570	353	0	1	1	1
	180	4898	462	533	603	1	1	1	1
	180	548	651	481	401	0	0	0	1
	180	553	1375	567	846	0	1	1	0
	180	3548	530	479	547	0	1	0	1
	180	625	1174	712	805	0	0	0	1
	240	667	1500	675	700	0	0	0	0
	240	1453	5447	674	360	0	1	0	0
	240	1201	6796	654	1454	1	0	0	1
	240	4529	526	1109	1235	0	1	0	1
	240	1238	443	2099	701	1	1	1	1
	240	358	1620	913	622	0	0	1	0
	300	4834	1012	819	1802	0	0	1	1
	300	719	834	1006	1600	0	1	1	0
	300	1488	1164	586	1278	1	0	1	0
	300	550	471	8000	5794	1	1	0	0
	300	538	445	742	1499	0	1	0	1
	300	639	1108	535	1078	1	1	0	1
sub058	0	5598	3643	3516	2183	1	1	0	1
	0	3381	3849	3660	2567	1	1	1	1
	0	4841	2198	2138	1629	1	1	1	1
	0	4206	4659	2919	2319	1	1	1	1
	0	3533	2034	2824	3557	1	1	1	1
	0	4738	6784	2961	3331	1	1	1	1
	60	2697	2381	6036	1942	1	1	1	1
	60	3719	3163	4434	3065	1	1	1	1
	60	1935	4796	2118	2266	1	1	1	1
	60	2178	2570	2719	1873	1	1	1	1
	60	1929	4164	2761	2233	1	1	1	1
	60	2917	2917	1781	2168	1	1	1	1
	120	3526	2770	2020	1923	1	1	1	1
	120	2729	3065	4922	2332	1	1	1	1
	120	2174	2188	3337	5825	1	1	1	1
	120	1789	1942	4131	5116	1	1	1	1
	120	3546	3916	2688	2070	1	1	1	1
	120	2354	2698	3039	2897	1	1	1	1
	180	1728	2310	3792	2225	1	1	1	1
	180	2199	2863	3265	2907	1	1	1	1
	180	2100	1942	3644	3738	0	1	1	1
	180	4158	2739	4970	2677	1	1	1	1
	180	2690	2960	5068	1722	1	1	1	1
	180	2618	2499	4891	2259	1	1	1	1
	240	2097	8000	6364	2634	1	0	1	1
	240	2864	4016	6164	4931	1	1	1	1
	240	3941	2724	7331	3069	1	1	1	1
	240	5363	2834	2305	4361	1	1	1	1
	240	4066	3445	2949	1762	1	1	1	1
	240	2797	2593	2897	2080	0	1	1	1
	300	2969	2503	4252	4432	1	1	1	0
	300	4498	8000	4789	1825	1	0	1	1
	300	3570	5524	3244	2517	1	1	1	1
	300	2621	3689	4030	2085	1	1	1	1
	300	4894	3217	2445	7318	1	1	1	1
	300	3170	2825	2601	2143	1	0	1	1
sub059	0	2190	2032	1836	2644	1	1	1	1
	0	4657	2832	2765	2268	1	0	1	0
	0	2453	2847	1875	2948	0	1	1	1
	0	976	2309	1992	3591	0	1	1	1
	0	2295	281	1847	4981	1	1	1	1
	0	2338	1955	2320	1888	1	1	1	1
	60	1698	1157	6094	2180	1	1	0	1
	60	1932	1516	2489	1581	1	1	1	1
	60	1559	1728	2561	1714	1	1	1	1
	60	2621	2272	2505	1624	1	1	1	1
	60	1465	2198	2296	1541	1	1	0	1
	60	1767	2112	2408	1609	1	1	1	1
	120	2493	1714	2439	2736	1	1	1	0
	120	1926	1467	2111	1530	1	1	1	1
	120	1756	3144	2284	1909	1	1	1	1
	120	2361	2233	2530	1853	1	1	1	1
	120	8000	4305	1971	1553	0	1	1	1
	120	2397	1086	3177	2721	1	1	0	1
	180	3078	2081	2476	2579	1	1	1	1
	180	3668	2348	1987	2361	1	1	0	1
	180	3238	2043	3124	1598	1	1	1	1
	180	2579	1839	1859	1358	1	1	1	1
	180	945	1831	6676	2628	1	1	1	1
	180	1800	3630	4802	2319	1	1	1	1
	240	2844	3281	3476	2196	1	1	0	1
	240	2964	3378	8000	2465	0	0	0	0
	240	2600	8000	4169	3880	1	0	1	0
	240	3114	4987	2361	2921	1	1	1	0
	240	2249	4458	2220	3296	1	0	1	1
	240	6302	4198	4732	5661	0	0	1	1
	300	2073	1448	3298	3195	1	1	1	0
	300	6174	8000	2208	1981	0	0	1	1
	300	3024	8000	1922	4470	0	0	1	1
	300	5262	7938	2924	3383	1	1	1	1
	300	3171	3045	3526	3591	0	0	1	1
	300	5074	2403	2410	3241	0	1	0	1
sub060	0	2243	2578	3596	2030	1	1	0	1
	0	3066	3605	1785	5320	0	1	1	1
	0	3041	2766	2946	2196	1	0	1	1
	0	2868	3986	2093	2749	1	1	1	1
	0	2459	3340	2706	2459	1	1	0	1
	0	7177	2127	2223	1575	1	1	1	1
	60	1955	2374	1093	2237	1	1	0	0
	60	2675	1477	2358	1429	1	1	1	1
	60	2525	2483	3983	2846	0	1	1	0
	60	1998	2075	1589	4698	1	1	1	0
	60	1548	2789	2073	6590	1	1	1	0
	60	1104	2310	3563	1852	0	0	0	1
	120	2722	6161	2867	2431	1	1	1	1
	120	1998	2717	5829	2299	1	1	0	1
	120	2706	2966	1845	2459	1	0	1	1
	120	1275	2159	2329	1914	1	1	1	1
	120	3387	3204	2459	1173	1	1	1	0
	120	4444	5161	2146	1130	1	1	1	1
	180	2269	3173	3432	2863	1	1	0	1
	180	1779	8001	3258	1833	0	0	1	1
	180	1850	1702	2026	3052	1	1	0	0
	180	3733	2570	3198	2468	1	1	1	1
	180	3297	3313	2804	3921	1	1	0	1
	180	4430	2289	4695	7177	1	1	1	1
	240	3070	8000	3526	7692	0	0	1	0
	240	3189	4320	6543	7727	0	1	1	1
	240	6884	1635	1742	8000	0	1	1	0
	240	1473	1619	8000	2459	0	0	0	0
	240	2213	8000	2919	5788	1	0	1	0
	240	2999	2530	1837	2314	0	1	1	1
	300	6075	4508	4037	2595	1	1	0	0
	300	1461	1933	3479	2695	0	0	1	0
	300	5990	4214	1752	1720	0	1	1	1
	300	1876	3230	1858	3286	0	1	1	1
	300	8000	2060	2551	8000	0	1	0	0
	300	1790	2250	1988	3733	0	0	1	1
sub061	0	2863	2660	1960	1348	1	1	1	1
	0	3781	2354	1212	1264	1	1	1	1
	0	959	3592	1600	4272	0	1	1	1
	0	3205	2873	1588	1641	1	1	1	1
	0	2457	2965	1087	1658	1	1	1	1
	0	4705	2070	2182	1545	1	1	1	1
	60	2427	2426	1422	1559	1	1	1	1
	60	2419	3122	2076	2318	1	1	1	1
	60	2095	2934	2576	1576	1	1	1	1
	60	3394	1833	1272	1630	1	1	1	1
	60	2390	2454	1443	1267	1	1	1	1
	60	4742	1751	1046	1930	1	1	1	1
	120	2792	2342	1874	1430	1	0	1	1
	120	7271	2204	2347	1840	1	1	1	1
	120	2088	1191	3487	1520	1	1	1	1
	120	1656	1901	1365	2001	1	1	1	0
	120	1704	1989	1857	1468	1	1	1	1
	120	2700	3193	1982	1787	1	1	1	1
	180	1730	3616	4462	1846	1	1	1	1
	180	4162	1923	4135	1808	1	1	1	1
	180	2517	3940	2929	2414	0	1	1	1
	180	6388	4899	2493	1770	1	0	1	1
	180	6749	4242	2143	1913	1	1	1	1
	180	6089	1643	2554	5523	0	1	1	0
	240	7148	2626	1523	2240	1	0	1	1
	240	2388	2292	2082	1944	1	1	1	1
	240	2822	1896	2488	1776	1	1	1	1
	240	3216	1743	2215	2696	1	1	1	1
	240	2288	2910	1761	2793	1	0	1	1
	240	4280	1917	3170	2691	1	1	1	1
	300	2390	5644	1692	1527	1	1	1	1
	300	6198	2964	1996	1206	1	1	1	1
	300	3238	2292	1687	1320	1	1	1	1
	300	930	2007	2377	2112	0	1	1	1
	300	1672	4204	2048	1831	1	0	1	1
	300	2189	2558	1457	2056	1	1	1	1
sub062	0	898	1283	2132	525	0	1	1	1
	0	2265	1090	2079	2379	1	0	0	0
	0	749	1731	476	2352	1	1	1	0
	0	1974	1650	2063	2566	1	1	1	0
	0	1819	3740	2636	2014	1	1	1	0
	0	1144	473	2451	3217	0	0	1	0
	60	913	510	757	799	0	1	1	0
	60	1659	2462	875	773	0	1	0	1
	60	2129	468	477	1674	1	0	0	0
	60	1086	4172	863	2086	1	1	1	0
	60	1266	2321	608	6038	0	1	1	0
	60	2372	2483	600	1985	1	1	0	0
	120	2312	2565	3213	841	0	1	0	0
	120	2657	615	1633	510	0	1	1	0
	120	1277	1399	891	1012	1	0	0	1
	120	1454	826	1045	1096	0	1	1	0
	120	2934	818	2707	2476	0	0	0	1
	120	1311	394	4347	2607	1	1	1	0
	180	3035	2013	961	7278	1	1	1	1
	180	627	1157	717	5000	1	1	1	1
	180	2067	1912	857	553	1	0	1	0
	180	1747	1975	5013	449	0	1	1	1
	180	1093	517	1682	1400	0	0	1	1
	180	1089	1471	623	3260	0	0	0	0
	240	525	1106	1311	1272	1	1	1	1
	240	4498	5068	1504	508	1	1	1	0
	240	385	839	678	655	0	0	0	0
	240	3088	363	815	1173	0	0	0	0
	240	1590	3335	3430	2740	0	1	0	1
	240	1199	1742	1132	1576	0	1	1	1
	300	704	4600	1287	2152	1	1	0	1
	300	3685	2992	3170	1284	0	1	1	1
	300	1202	3537	1634	4819	1	1	0	0
	300	2629	1043	1230	550	0	1	0	0
	300	757	4138	1999	1094	0	1	0	0
	300	1503	500	430	6060	0	0	0	1
sub063	0	6931	1252	1616	1200	1	1	1	1
	0	2065	2586	1344	1801	1	1	1	1
	0	2415	2569	3381	1630	1	1	1	1
	0	1572	1715	1470	1697	1	1	1	1
	0	2788	2626	1961	2906	1	1	1	1
	0	2594	4608	1453	1482	1	1	1	1
	60	1654	3920	1064	1272	1	1	1	1
	60	2229	2596	1257	1437	1	1	1	1
	60	4077	1526	1129	2645	1	1	1	1
	60	2036	1393	3517	1534	1	1	1	1
	60	1523	1582	963	2926	1	1	1	1
	60	1457	1798	2240	1643	1	1	1	1
	120	3212	6469	2055	1801	1	1	1	1
	120	8000	1727	3770	5037	0	1	1	1
	120	1793	5104	1731	5019	1	1	1	0
	120	1468	3533	1929	2506	1	1	1	1
	120	2490	4607	1853	8000	1	1	1	0
	120	2112	7172	2747	1609	1	0	1	1
	180	2029	3831	2541	2507	1	1	0	0
	180	5771	7749	2824	1367	1	1	0	1
	180	1814	3526	3364	3011	1	1	0	1
	180	3025	2612	4370	1636	1	1	0	1
	180	1740	1396	3584	4466	1	1	0	1
	180	1623	5160	2262	2069	0	0	0	1
	240	1873	5843	2895	2248	0	1	1	0
	240	2684	5091	5590	3865	1	0	1	0
	240	3762	1766	2724	2831	1	0	1	1
	240	2152	1906	5493	5051	1	0	0	1
	240	6390	3813	2555	2033	0	1	0	1
	240	3553	4065	4030	7434	0	1	1	1
	300	1889	1877	1743	1014	1	0	1	0
	300	1680	2539	4489	3291	1	1	1	1
	300	2696	3181	2741	2612	0	1	1	1
	300	1414	2791	2302	4795	1	1	1	1
	300	1577	5412	1827	3072	0	1	0	1
	300	2053	2713	2129	3025	0	1	1	1
sub065	0	4013	3598	2090	2039	1	1	1	1
	0	3301	2712	1295	3179	1	1	1	1
	0	4862	2376	2382	3463	1	1	1	1
	0	8000	5908	1883	2785	0	1	1	1
	0	3137	3590	1931	3753	1	1	1	1
	0	2869	2572	1936	1791	1	1	1	1
	60	2643	1359	1330	5215	1	1	1	1
	60	2879	1729	2531	1695	1	1	1	1
	60	2606	4014	3587	2060	1	1	1	1
	60	2406	2846	1358	1534	1	1	1	1
	60	1992	1896	2025	3007	1	1	1	1
	60	2383	2011	2069	1921	1	1	1	1
	120	6118	2933	4230	2624	1	1	1	1
	120	3106	3094	3113	7872	1	1	1	1
	120	3657	3694	2394	2606	1	1	1	1
	120	8000	3161	1175	2959	0	0	1	1
	120	4404	8000	4883	3274	1	0	1	1
	120	2348	1848	4002	4104	1	1	1	1
	180	8000	1532	6315	2564	0	1	1	1
	180	7183	4808	5867	1574	1	1	1	1
	180	8000	5298	8000	4095	0	0	0	1
	180	3351	5748	7339	4354	1	1	0	1
	180	8000	4253	5584	3438	0	1	0	0
	180	4997	3752	4656	2034	1	1	1	0
	240	4986	6270	2354	8000	0	0	1	0
	240	5137	4627	4174	8000	1	1	1	0
	240	7307	7916	4390	5213	1	1	1	0
	240	3455	4607	8000	7033	1	1	0	0
	240	8000	2663	3568	3497	0	1	1	1
	240	4855	8000	6568	7023	1	0	1	1
	300	3473	2155	8000	3956	1	1	0	1
	300	6029	4159	5401	3911	0	1	1	1
	300	4622	5672	8000	3596	1	1	0	1
	300	4884	8000	3196	2515	1	0	1	1
	300	5340	7132	3047	5923	1	1	1	1
	300	6349	8000	2848	2623	1	0	1	1
sub066	0	6130	1887	1899	1818	1	1	1	1
	0	2723	2542	3424	1482	0	1	1	1
	0	3613	3467	1175	1962	1	1	1	1
	0	4284	4318	2429	1853	1	1	1	1
	0	3962	3440	1534	1414	1	1	1	1
	0	5026	5179	1729	1805	1	1	1	1
	60	2968	4186	997	1643	1	1	1	1
	60	6705	2492	5573	4075	1	1	0	1
	60	6634	1599	3303	1028	1	1	1	1
	60	4587	2215	3657	2856	1	1	1	1
	60	1559	6934	1638	2540	1	1	1	1
	60	1981	5179	2354	1331	1	1	1	1
	120	2521	1877	2935	2259	1	1	1	1
	120	2129	5818	3210	1744	1	1	1	1
	120	4856	4592	2866	2654	1	1	1	1
	120	3705	1771	3525	3756	1	1	1	1
	120	4640	1935	3321	1914	1	1	1	1
	120	3092	1436	2516	2343	1	1	1	1
	180	2382	2543	7572	1374	1	1	1	1
	180	2365	2620	5106	4297	1	1	1	1
	180	2066	3644	2319	1461	1	1	0	0
	180	1785	3212	3953	1995	1	1	1	1
	180	2440	2604	2884	2617	1	1	1	1
	180	2575	8000	8000	3086	1	0	0	1
	240	3706	2140	5070	1913	1	1	1	1
	240	3824	2300	2891	3501	1	1	1	1
	240	8000	7516	3914	4928	0	1	0	1
	240	3227	4434	1730	4967	0	1	1	1
	240	2433	3089	3132	3284	1	1	1	1
	240	3462	2460	3916	8000	0	1	0	0
	300	3248	2171	2106	1923	1	1	1	1
	300	6938	2476	3319	1854	1	1	1	1
	300	2317	4426	4288	2141	1	1	1	1
	300	3325	6479	3316	2454	1	1	1	1
	300	3476	4393	2247	2512	1	1	1	1
	300	5932	8000	1952	1702	0	0	1	1
sub110	0	4263	2272	4141	1799	1	1	1	1
	0	3847	2936	1556	2275	1	1	1	1
	0	2464	3615	4289	2989	1	1	1	1
	0	2670	1730	2221	2967	1	1	1	1
	0	2760	4117	1907	1654	1	1	1	1
	0	2889	3189	2563	1622	1	1	1	1
	60	1128	3473	2779	2629	1	1	1	1
	60	1710	2955	1924	1879	1	1	1	1
	60	1937	2128	1784	2839	1	1	1	1
	60	2807	1961	2880	2091	1	1	1	1
	60	2452	4350	1343	1479	1	1	1	1
	60	5305	1712	1659	2950	1	1	1	1
	120	1897	1836	2798	2324	1	1	1	1
	120	1791	1923	2101	2284	1	1	1	1
	120	2238	1687	2193	1798	1	1	1	1
	120	2119	3165	2122	2411	1	1	1	1
	120	1766	1757	3477	4686	1	1	1	1
	120	3541	4704	2424	2379	1	1	1	1
	180	2740	3918	2621	3299	1	1	1	1
	180	3869	4428	2904	7575	1	1	1	1
	180	3601	8000	4439	3617	1	0	1	1
	180	3801	3944	3636	6148	1	1	1	1
	180	3355	5388	2956	2657	1	1	1	1
	180	4415	5094	3182	3404	1	1	1	0
	240	4202	3100	2646	2578	1	1	1	1
	240	3092	2182	2203	4394	1	1	1	1
	240	8000	2610	2953	3399	0	1	1	1
	240	3657	2277	2731	2888	1	1	1	1
	240	4083	2875	3398	3663	1	0	1	1
	240	3286	2779	2608	3933	1	1	1	1
	300	2214	3821	1817	5187	1	1	1	1
	300	2847	2464	3034	3828	1	1	1	1
	300	1755	4100	3358	3386	1	1	1	1
	300	2851	3119	5836	1857	1	1	1	1
	300	6043	3306	1904	3775	1	1	1	1
	300	1215	4126	1903	1610	1	1	1	1
sub111	0	3439	5100	2128	1825	0	1	1	1
	0	3274	2714	2373	1550	1	1	1	1
	0	3006	2199	2122	2207	1	1	1	1
	0	7486	3857	2913	1780	1	1	1	1
	0	2344	2972	1813	2836	1	1	1	1
	0	6026	3371	1904	2174	1	1	1	1
	60	2591	2042	1735	1760	1	1	1	1
	60	2044	1782	1576	1311	1	1	1	1
	60	3027	1818	1502	1767	1	1	1	1
	60	2423	4203	2255	2423	1	1	1	1
	60	3250	2141	2348	2835	1	1	1	1
	60	5420	3362	2251	2266	1	1	1	1
	120	2836	2458	3078	1877	1	1	1	1
	120	3281	3089	2658	1632	1	1	1	1
	120	1874	3427	2202	8001	1	1	1	0
	120	2425	2749	2149	2031	1	1	1	1
	120	2365	2248	1945	2976	1	1	1	1
	120	2425	1509	2608	1321	1	1	1	1
	180	3387	2873	4208	1960	1	1	1	1
	180	2862	2960	3821	2150	1	1	1	1
	180	3161	2347	3004	1978	1	1	1	1
	180	4251	3617	3547	4342	1	1	1	1
	180	3567	4312	8000	2644	1	1	0	1
	180	2438	2011	4882	2631	1	1	1	1
	240	2210	3786	3134	4122	1	1	1	1
	240	6965	6264	4245	4074	1	1	1	1
	240	5871	3717	3093	3634	1	1	1	1
	240	4672	2426	3399	2402	1	1	1	1
	240	3188	1826	3724	4134	1	1	1	1
	240	1750	3817	3207	8000	1	1	1	0
	300	2984	2690	2798	2027	1	1	1	1
	300	4073	2909	1758	2291	1	1	1	1
	300	3250	3380	4951	2899	1	1	1	1
	300	2085	2163	2541	3087	1	1	1	1
	300	1769	2352	2785	4180	1	1	1	1
	300	4102	3759	2597	3039	1	1	1	1
sub112	0	1700	4165	1426	3527	1	1	1	1
	0	3172	2644	1265	1131	1	1	1	1
	0	2557	3568	2382	2525	1	1	1	1
	0	4267	2692	1169	1740	1	1	1	1
	0	2541	3841	997	1225	0	1	1	1
	0	3510	5770	3298	3303	1	1	1	1
	60	3809	3766	6598	2649	1	1	1	1
	60	2660	3869	2305	1086	1	1	1	1
	60	1974	6065	2202	1478	1	1	1	1
	60	3396	3655	4060	1929	1	1	1	1
	60	6601	8000	1226	1306	1	0	1	1
	60	1846	1801	1933	1400	1	1	1	0
	120	2774	5145	1507	4218	1	1	1	1
	120	2501	4679	1182	2909	1	1	1	1
	120	1697	2660	3912	1724	1	1	1	1
	120	2783	2250	5012	6985	1	1	1	1
	120	8000	7016	2127	4069	0	1	1	1
	120	2809	4711	4786	2140	1	1	1	1
	180	2549	2015	5634	1368	1	1	1	1
	180	3916	4619	5178	2192	1	0	0	1
	180	3062	2700	4040	5978	1	1	1	1
	180	1720	8000	2161	4192	1	0	0	0
	180	3486	7357	5023	3272	1	1	1	1
	180	2825	3162	4148	1650	1	1	1	1
	240	8001	6737	3032	3059	0	0	1	1
	240	1506	3061	5413	3743	1	1	1	1
	240	4364	4780	5849	3751	1	1	1	1
	240	4743	5071	3421	7497	1	1	1	1
	240	3427	8000	5668	3123	1	0	1	1
	240	2058	6638	2341	3390	1	0	1	1
	300	1871	4151	3265	2150	1	0	1	1
	300	4846	3490	1962	2654	0	1	1	1
	300	2745	3648	1715	5928	1	0	1	1
	300	2404	4909	2131	6773	1	1	1	1
	300	4250	3039	1755	5740	1	1	1	1
	300	4836	3699	1658	2235	1	1	1	1
sub113	0	2764	2326	1305	2215	1	1	1	1
	0	2383	2668	1734	1931	1	1	1	1
	0	2315	1489	1503	1044	1	1	1	1
	0	3217	1140	1461	943	1	0	1	1
	0	2126	2274	2328	1381	1	1	1	1
	0	2309	1362	1324	1422	0	0	1	1
	60	3589	1255	1533	1931	1	1	1	1
	60	2121	1358	1547	2261	1	1	1	1
	60	4025	1448	1655	794	1	1	1	1
	60	1876	1355	1058	1809	1	1	1	1
	60	2240	4073	1646	1637	1	1	1	1
	60	4044	2369	1657	907	1	1	1	1
	120	2055	1446	1979	2055	1	1	1	1
	120	2979	1436	1393	1446	1	1	1	1
	120	2038	1225	1735	1411	1	1	1	1
	120	1501	1256	4315	1696	1	1	1	1
	120	1710	2098	1693	2411	1	1	1	1
	120	1326	2329	1608	1135	1	1	1	1
	180	2000	2187	2371	2331	1	1	1	1
	180	3443	1673	1879	2608	1	1	1	0
	180	2067	1636	3935	1094	1	1	1	1
	180	1491	2149	2792	2089	1	1	1	1
	180	3135	1542	4824	1338	1	1	1	1
	180	1809	2081	3156	1737	1	1	1	1
	240	1631	3476	2445	2580	1	1	1	1
	240	2246	1640	2981	1506	1	1	1	1
	240	3037	2888	1510	1928	1	1	1	1
	240	2788	1633	2189	2943	1	1	1	1
	240	2110	1658	2093	2141	1	1	1	1
	240	3982	3058	1534	4393	1	1	1	1
	300	2957	2556	1520	2026	1	1	1	1
	300	1554	2258	1799	1450	0	0	1	1
	300	2601	2128	1587	2613	0	0	1	1
	300	2328	1359	1800	1829	1	1	1	0
	300	1693	3629	1262	1199	1	1	1	1
	300	2034	1498	1751	1735	1	0	1	1
sub114	0	2737	4633	1510	1170	1	1	1	1
	0	6906	2291	1805	2201	1	0	1	1
	0	2419	2671	1766	1245	1	1	1	1
	0	2814	3359	1407	1244	1	0	1	1
	0	3502	5740	1641	1498	1	1	1	1
	0	6866	4053	2561	2003	1	1	1	1
	60	7743	2107	3125	1853	1	1	1	1
	60	4821	3737	1650	1959	1	1	1	1
	60	1344	3586	3069	1332	1	1	1	1
	60	1897	7494	2839	2896	1	0	1	1
	60	3654	1142	1613	2026	1	0	1	1
	60	1842	1405	1466	2339	1	1	1	1
	120	3233	3157	2118	2225	1	1	1	1
	120	8000	4842	4146	1487	0	0	1	1
	120	1887	1295	7247	1247	1	1	1	1
	120	2314	1659	1618	3074	1	1	1	1
	120	4140	3205	2661	3271	0	1	1	1
	120	5533	2889	3200	3075	1	1	1	1
	180	4997	2768	3823	1999	0	1	1	1
	180	4330	4739	6878	4385	1	1	1	0
	180	3711	4083	2747	1925	1	1	1	1
	180	4911	1720	7260	2492	1	0	0	0
	180	2869	2535	2968	2565	1	1	0	1
	180	5897	2786	3254	6303	1	1	1	1
	240	2050	3158	2847	6657	1	0	1	1
	240	2807	4526	1858	2258	1	1	1	0
	240	5147	1506	1791	6617	1	0	1	1
	240	1649	2408	4946	2045	1	0	1	0
	240	2818	3454	3590	6330	1	1	1	0
	240	4809	8000	2327	4024	1	0	1	1
	300	2852	4640	1821	4050	1	1	1	1
	300	6446	7425	5188	3431	1	1	1	1
	300	3530	6191	1374	2389	1	1	1	1
	300	5425	5581	2141	1592	1	1	1	1
	300	3104	1701	4363	3382	1	0	1	1
	300	2196	2357	2055	2416	1	1	1	0
sub116	0	3340	1831	976	621	1	1	1	1
	0	2510	2484	674	1007	1	1	1	1
	0	2316	2123	1057	936	1	1	1	1
	0	1361	2340	1648	1096	1	1	1	1
	0	2832	1735	1932	1439	1	1	1	1
	0	1453	1965	954	772	1	1	1	1
	60	2034	1816	1172	950	1	1	1	1
	60	2402	1963	1265	893	1	1	1	1
	60	2048	2211	1346	2054	1	1	1	1
	60	1563	4271	984	1875	1	1	1	1
	60	1547	2200	635	1035	1	1	1	1
	60	1418	1395	1488	705	1	0	1	1
	120	736	1394	1181	1045	0	1	1	1
	120	2133	1042	1984	1204	1	1	1	1
	120	1789	2031	888	897	1	1	1	1
	120	967	1774	1694	1639	0	1	1	1
	120	1143	1805	1658	1096	1	1	1	1
	120	1204	1849	1159	1936	0	1	1	1
	180	3308	3996	2459	3005	1	1	1	1
	180	3089	1381	2302	1242	1	1	1	1
	180	2902	2060	1764	1947	1	1	0	1
	180	1440	1281	2597	1591	1	1	1	1
	180	1766	1427	1572	2952	1	1	1	1
	180	1680	1320	2618	1764	0	1	1	1
	240	1169	3545	1067	1974	0	1	1	1
	240	1977	2132	881	6601	1	1	1	1
	240	1932	2697	1950	2134	1	1	1	1
	240	5625	1466	1312	1364	1	1	1	0
	240	2174	4400	1450	1850	1	1	1	1
	240	2082	1251	2182	1732	1	1	1	1
	300	1219	2245	1532	958	1	1	1	1
	300	1662	3312	677	860	1	1	1	1
	300	4257	1796	1096	892	0	1	1	1
	300	2081	1956	1615	1254	1	1	1	1
	300	2114	3193	914	875	1	1	1	1
	300	1468	2847	856	1175	1	1	1	1
sub117	0	5745	1919	1083	1308	1	1	1	1
	0	8000	2489	1277	1674	0	0	1	1
	0	2445	4584	2000	1600	1	1	1	1
	0	3129	4016	2114	5075	1	1	1	1
	0	2579	2370	1449	1686	1	1	1	1
	0	2711	5388	4205	2719	1	1	1	1
	60	2080	2885	3650	2053	0	1	1	1
	60	4718	2401	3201	2617	0	1	1	1
	60	3277	2210	1830	1619	1	1	1	1
	60	2958	4338	2372	1691	1	1	1	1
	60	3348	2542	1942	2113	1	1	1	1
	60	3940	1958	1454	2571	1	1	1	1
	120	4168	6347	4410	2216	1	1	1	1
	120	8000	2690	2387	3521	0	1	1	1
	120	5222	2095	2475	4078	1	1	1	1
	120	1521	1701	2736	1993	1	1	1	1
	120	2650	1441	4291	3785	1	1	1	1
	120	1899	2863	2304	1603	1	1	1	1
	180	6390	2940	2362	4281	0	1	1	1
	180	1576	6530	3772	3134	1	1	1	1
	180	3126	4376	6549	2010	1	1	1	1
	180	6427	2743	3557	3258	1	1	1	1
	180	3108	1882	4051	2225	1	1	1	1
	180	2974	1460	3821	1563	1	1	1	1
	240	8000	8000	2199	2591	0	0	1	0
	240	6445	3737	2276	8000	0	1	1	0
	240	5901	4972	3460	3581	1	1	1	1
	240	2859	4664	2762	2544	0	1	1	1
	240	4965	3485	2770	5092	1	1	1	1
	240	7572	2115	3842	3730	1	1	1	1
	300	2407	3196	1920	2060	0	1	1	1
	300	2537	2499	1474	1383	0	1	1	0
	300	4384	4849	3826	2496	1	1	1	1
	300	2215	2862	2494	2022	1	1	1	1
	300	2056	3361	1278	3422	0	1	1	1
	300	2627	5852	1916	2300	1	1	1	1
sub118	0	5369	3412	1322	1173	1	1	1	1
	0	2436	2421	3745	2505	1	1	1	1
	0	2745	1881	1674	1985	1	1	1	1
	0	2007	2085	1325	2511	1	1	1	1
	0	3364	1967	1518	1053	1	1	1	1
	0	2291	3056	1214	2460	1	1	1	1
	60	3483	2561	1812	4736	1	1	1	1
	60	2339	997	3795	1158	1	1	1	1
	60	3815	2979	2742	1329	0	1	1	1
	60	2253	1262	1674	1548	1	1	0	1
	60	1305	1683	1511	2730	1	1	1	1
	60	1553	2814	1617	1997	1	1	1	1
	120	1148	1450	1520	3926	1	1	1	1
	120	2684	2824	2200	2201	1	1	0	1
	120	1311	2932	1609	5464	1	1	0	0
	120	4436	1528	6731	3028	1	1	1	1
	120	3340	5084	2296	1863	1	1	0	1
	120	3004	2224	3911	1708	1	1	0	1
	180	5038	2915	2769	2723	1	1	1	1
	180	1838	2183	5619	3690	0	1	1	0
	180	2724	3863	5070	2366	0	1	0	1
	180	6126	4140	2208	2972	0	1	0	1
	180	2878	3419	2582	2105	1	1	1	1
	180	1945	2479	3986	2705	1	0	1	0
	240	4538	3180	3798	4802	1	1	1	1
	240	2177	4681	3945	3687	0	1	1	1
	240	6009	5022	3326	8000	1	1	1	0
	240	3602	2992	2510	2543	1	1	1	1
	240	2908	4149	2768	2572	1	1	1	1
	240	931	1469	3356	4626	0	1	1	0
	300	4055	1966	1839	2427	1	1	1	1
	300	3145	4334	1915	2591	1	1	1	1
	300	4618	3044	1772	1070	1	1	1	0
	300	2303	3066	1907	2722	1	1	0	1
	300	2443	2037	2009	2049	1	1	1	1
	300	3577	3292	2727	3166	1	1	1	1
sub119	0	1999	2241	945	1101	0	1	0	1
	0	6644	7275	2112	1725	0	0	1	1
	0	2638	4051	1471	1148	1	1	1	1
	0	7061	4494	1756	2911	1	0	1	1
	0	1599	1804	1425	2022	0	1	1	1
	0	2161	1818	1177	1142	0	0	1	1
	60	1750	2987	1556	949	1	1	1	1
	60	5868	6082	1526	1730	1	1	1	1
	60	2399	3627	1923	3238	1	0	1	1
	60	2904	1639	1242	2166	1	1	1	1
	60	2969	8000	2304	1021	0	0	1	1
	60	2138	2890	1328	949	1	1	1	1
	120	5458	3947	2790	1429	0	1	1	1
	120	5065	2177	2340	2787	0	1	1	1
	120	2934	4221	5689	5534	1	1	1	1
	120	2070	6877	3053	1202	1	1	1	1
	120	1636	4697	4294	1547	1	0	1	1
	120	2634	2049	3243	950	1	1	1	1
	180	1599	2823	6127	8000	1	1	1	0
	180	8000	3625	6206	2195	0	1	0	0
	180	6468	8000	4767	4224	0	0	1	1
	180	4558	4750	2476	6493	1	0	1	1
	180	7234	2079	5685	3199	1	1	0	1
	180	6124	8000	2490	3716	1	0	1	1
	240	6063	2522	3374	1853	1	1	1	1
	240	4166	4804	2147	3720	1	0	1	0
	240	8000	5337	1581	2708	0	1	1	0
	240	5768	1871	3241	5854	1	1	1	0
	240	2808	2077	1253	5395	1	1	1	0
	240	1614	5879	1926	6222	0	1	1	1
	300	2896	2300	3305	1546	1	1	1	1
	300	6806	4197	1716	1685	1	1	1	1
	300	2068	3680	2281	3402	1	1	0	1
	300	7444	6826	1616	1405	1	1	1	0
	300	2120	2935	3670	3377	0	1	1	1
	300	6541	3369	2664	2011	1	1	1	0
sub120	0	2158	2112	1949	1755	1	1	1	1
	0	3373	3190	2861	2793	1	1	1	1
	0	3429	5250	8001	1810	1	1	0	1
	0	1657	2806	2992	2541	1	1	1	1
	0	2970	3039	1766	1687	1	1	0	1
	0	8000	3068	2340	2561	0	1	1	1
	60	3256	6989	2692	2827	1	1	1	1
	60	2679	1335	2050	3016	1	0	1	1
	60	2250	1754	1846	5162	1	1	1	1
	60	2325	3206	3077	1905	1	1	1	1
	60	2084	2342	8000	5725	1	1	0	1
	60	3416	3007	2182	1676	1	1	1	1
	120	3135	2997	2591	1264	1	1	1	1
	120	2695	4030	1819	1762	1	1	1	1
	120	2694	3641	2189	1793	1	1	1	1
	120	1628	6719	1585	2135	1	1	1	1
	120	3579	2394	1938	2817	1	1	1	1
	120	2308	1728	2523	2609	1	1	1	1
	180	4166	3770	4026	1632	1	1	1	1
	180	2814	7829	4439	2355	1	1	1	1
	180	2386	1164	2211	1921	1	1	1	1
	180	2106	6415	5430	2265	1	1	1	1
	180	4519	1492	2726	2228	1	1	1	1
	180	4261	3486	4479	7513	1	1	1	1
	240	5139	3144	4261	2935	1	1	1	1
	240	5318	2202	4337	3935	1	1	1	1
	240	5981	2057	2276	4387	1	1	0	1
	240	3215	5450	4710	3746	1	0	1	1
	240	2778	8000	3757	2946	1	0	1	1
	240	3806	5645	2916	2681	1	1	1	1
	300	2674	1826	3148	4913	1	1	1	1
	300	2928	6931	1997	3211	1	1	1	1
	300	5604	2608	3372	3551	1	1	1	1
	300	4083	4079	2466	2159	1	1	1	1
	300	4604	2340	1457	1612	1	1	1	1
	300	3549	3399	4063	1360	1	1	1	1
sub122	0	2507	4942	1393	2382	1	1	1	1
	0	2699	1599	1612	3401	1	1	1	1
	0	3862	2377	1625	1820	0	1	1	1
	0	2157	3788	1419	2205	1	1	1	1
	0	2061	2733	1677	1723	1	1	1	1
	0	3485	1917	1668	1717	1	1	1	1
	60	1607	2264	1953	1729	1	1	1	1
	60	1622	1694	1993	3018	1	1	1	1
	60	1890	2427	1386	2037	1	1	1	1
	60	2089	1999	2999	1362	1	1	1	1
	60	1636	1117	1674	1741	1	1	1	1
	60	1411	1457	2249	1958	1	1	1	1
	120	1517	1627	2141	2584	1	1	1	1
	120	2267	1934	2085	2946	1	1	1	1
	120	1448	2331	1713	2387	1	1	1	1
	120	5314	2427	3968	1674	1	1	1	1
	120	1656	8000	5042	2611	1	0	1	1
	120	1392	1809	6806	1955	1	1	1	1
	180	4250	2551	2254	8000	1	1	1	0
	180	2806	2849	3490	1634	1	1	1	1
	180	3173	1665	1916	1991	1	1	1	1
	180	2660	1933	3829	2683	1	1	1	1
	180	3231	2058	2965	1593	1	1	1	1
	180	3094	1701	3430	4117	1	1	1	1
	240	5236	3412	2172	4383	0	1	1	1
	240	4302	3702	1778	5047	0	1	1	1
	240	2279	7514	2582	3311	1	1	1	1
	240	6415	1718	2250	2957	1	0	1	1
	240	3917	5456	2616	2175	0	0	1	1
	240	4493	3257	2108	8000	1	1	1	0
	300	3268	1737	2650	2945	1	1	1	1
	300	3166	3459	1775	1807	1	1	1	1
	300	2580	2928	2591	2976	1	0	1	1
	300	2200	2705	2435	2347	1	1	1	1
	300	2599	2619	1678	2231	1	1	1	1
	300	4149	2062	3679	1646	1	1	1	1
sub123	0	1790	3931	2307	1838	1	1	1	1
	0	2267	3251	2073	956	1	1	1	1
	0	3625	5303	1405	1248	1	1	1	1
	0	2094	4408	1634	1531	1	1	1	1
	0	2490	2067	2511	1709	1	1	1	1
	0	1629	3384	1469	1629	1	1	1	1
	60	1823	1655	2197	1093	1	1	1	1
	60	1426	1310	1467	1774	1	1	1	1
	60	1809	1521	2139	2079	1	0	1	1
	60	1598	1569	2941	1749	1	1	1	1
	60	1587	1481	2343	1576	1	1	1	1
	60	1635	2437	1331	1143	1	1	1	1
	120	1894	1274	6753	2037	1	1	1	1
	120	1645	2152	3020	1133	1	1	0	1
	120	1585	1783	1912	1916	1	1	1	1
	120	2818	2608	1169	1467	1	1	1	1
	120	2213	2198	1328	2826	1	1	1	1
	120	1206	1693	2502	1883	1	0	1	1
	180	1634	1293	3452	1163	1	1	1	1
	180	2062	1687	1546	2005	1	1	0	1
	180	2098	3226	4604	1224	1	1	1	1
	180	1795	1948	2318	1262	1	1	1	1
	180	1514	2345	3158	1598	1	1	1	1
	180	1453	2596	2825	1861	1	1	1	1
	240	4753	2029	1466	4191	1	1	1	1
	240	4160	2678	2323	2205	1	1	1	1
	240	3269	1380	1971	2757	1	1	1	1
	240	1842	3173	3289	3205	1	1	1	1
	240	3365	2624	2823	2351	1	1	1	1
	240	1864	1564	2967	3536	0	1	1	1
	300	4465	2727	3095	2545	1	1	1	1
	300	1799	1891	1693	2472	1	1	1	1
	300	2847	4819	2053	3702	1	1	1	1
	300	3418	2843	3496	2124	1	1	1	1
	300	3037	2192	2092	2729	1	1	1	1
	300	2692	1818	3769	2808	1	1	1	1
sub124	0	4381	2358	1593	1303	1	1	1	1
	0	1811	1595	1135	1765	1	1	1	1
	0	2159	2022	1523	1503	1	1	1	1
	0	1789	2556	1344	1548	1	1	1	1
	0	1673	1671	1569	2138	1	1	1	1
	0	3809	2079	1520	1404	1	1	1	1
	60	1955	1455	1213	1715	1	1	1	1
	60	1641	1975	1131	985	1	1	1	1
	60	2828	1786	1624	2633	1	1	1	1
	60	1925	1769	2685	1557	1	1	1	1
	60	1665	1566	937	1267	1	1	1	1
	60	1563	2588	1912	1205	1	1	1	1
	120	2350	1918	1576	1618	1	1	1	1
	120	1867	1636	1965	2117	1	1	1	1
	120	2628	5435	1454	5895	0	1	1	1
	120	1236	2050	1500	2222	1	1	1	1
	120	1278	1347	1142	1580	1	1	1	1
	120	2917	1786	1226	1261	1	1	1	1
	180	3551	1482	7201	1806	0	1	0	1
	180	1838	2152	3970	2745	1	1	1	1
	180	5774	2002	2052	3277	1	1	1	1
	180	2784	2915	1945	1575	0	1	1	1
	180	5036	1937	2342	2446	1	1	1	1
	180	3235	1798	4366	2784	1	1	1	1
	240	2343	1898	1903	3040	1	1	1	1
	240	2067	1821	3669	2889	1	1	1	1
	240	2024	6790	1431	2092	1	1	1	1
	240	3146	1538	2521	1947	1	0	1	1
	240	2880	1570	1498	2888	1	1	1	1
	240	1750	5027	1440	2544	1	1	1	1
	300	3336	3715	1459	1580	1	1	1	1
	300	1573	2342	1994	1577	1	1	1	1
	300	1602	1849	2199	1549	1	1	1	1
	300	2116	4137	1122	1806	1	1	1	1
	300	1826	2508	2039	2185	1	1	1	1
	300	1927	2190	1969	1743	1	1	1	1
sub125	0	2893	3937	1285	1465	1	1	1	1
	0	2185	2819	2343	2496	1	1	1	1
	0	6241	1523	1886	2177	1	0	1	1
	0	2568	2982	1836	1233	1	1	1	1
	0	1315	1539	1308	1698	0	1	1	1
	0	3164	1383	1906	1183	1	0	1	1
	60	1593	7462	2916	1909	1	1	1	1
	60	2177	1718	1361	752	1	1	1	1
	60	1522	4190	1106	1180	1	1	1	1
	60	4350	1502	1228	1583	1	1	1	1
	60	2046	2153	2074	1080	1	1	1	1
	60	3320	2735	1972	1693	1	1	1	1
	120	2194	3184	2493	2483	1	1	1	1
	120	7563	2867	1799	1383	1	1	1	1
	120	2812	1727	4492	8000	1	1	1	0
	120	1459	2557	2418	1769	1	1	1	1
	120	1232	2573	1411	1186	1	1	1	1
	120	2558	2522	4743	1111	1	0	1	1
	180	5403	2145	2904	1227	1	1	1	1
	180	3352	4087	3931	3739	1	1	1	1
	180	3055	2475	1784	1652	1	1	1	1
	180	2651	1727	3539	2035	1	1	1	1
	180	7877	2989	4054	8000	1	1	1	0
	180	1084	1284	2113	1314	1	1	1	1
	240	5761	3847	2100	3972	1	1	1	1
	240	646	2180	4021	4246	0	1	1	1
	240	6567	2477	1467	2647	1	1	1	1
	240	4385	3858	1633	2378	1	1	1	1
	240	2244	2644	3776	3359	1	1	1	1
	240	2728	8000	3009	3203	1	0	1	1
	300	2868	1228	1477	1810	0	0	1	1
	300	3854	7295	1714	1986	1	0	1	1
	300	4119	1202	7477	2292	1	0	1	1
	300	4490	3908	1635	1936	1	0	0	1
	300	6231	3856	2176	2077	1	0	1	1
	300	2624	2479	2340	3185	0	1	1	1
sub126	0	3970	3579	1504	1587	1	1	1	1
	0	2392	3241	1375	2143	1	1	1	1
	0	2847	6414	1274	1471	0	1	1	1
	0	4667	3091	1846	2253	1	1	1	0
	0	2015	2949	1511	5007	1	1	1	1
	0	2419	4427	8000	1582	1	0	0	1
	60	2736	2240	1411	1651	1	1	1	1
	60	1912	1262	1346	1635	1	1	1	1
	60	2418	3502	4188	1161	1	1	1	1
	60	2348	1681	1506	2176	1	1	1	1
	60	5564	3052	3122	1559	1	1	1	1
	60	2975	3698	2238	1278	1	1	1	1
	120	4385	1780	2499	1917	1	1	1	1
	120	2297	2125	2068	5029	1	0	1	1
	120	5273	2003	1468	1339	1	1	1	1
	120	2995	1537	1737	1212	1	1	1	1
	120	2647	5767	2272	5325	1	0	1	1
	120	1356	1415	2346	5352	1	1	1	1
	180	8000	1705	2845	1822	0	1	1	1
	180	3193	8000	4624	4778	1	0	1	1
	180	2188	7876	2273	3773	1	1	0	1
	180	3526	3989	2909	1908	1	1	1	1
	180	8000	2412	4984	1899	0	1	1	1
	180	4506	3189	3507	4830	1	1	0	1
	240	2753	4242	2926	4327	1	1	1	0
	240	3825	4223	1577	8000	1	0	1	0
	240	2465	2651	2454	5197	1	0	1	1
	240	6615	5142	3518	3778	1	1	1	1
	240	3039	7031	4241	4556	1	1	1	1
	240	4908	3102	4955	2510	1	1	1	1
	300	2407	2693	2020	1395	1	1	1	1
	300	1340	6241	1372	1749	0	1	1	1
	300	2966	2496	2108	2381	1	1	1	1
	300	4200	2579	2640	1995	1	1	1	1
	300	5785	1802	2288	1669	1	1	1	1
	300	3414	2670	2218	1726	1	1	1	1
sub127	0	2519	3679	2449	1740	1	1	1	1
	0	2912	2082	1645	2026	1	1	1	1
	0	2490	2592	1299	2250	1	1	1	1
	0	2513	4370	1876	2171	1	1	1	1
	0	3134	1981	5259	1725	1	1	1	1
	0	2561	3799	1796	2931	1	1	1	1
	60	6333	2381	1591	1725	1	1	1	1
	60	2921	2125	3374	1616	1	1	1	1
	60	1452	3561	1717	1265	1	1	1	1
	60	3271	2739	2291	1281	1	1	1	1
	60	1948	1136	1681	1321	1	1	1	1
	60	1856	2010	1699	885	1	1	1	1
	120	1706	2571	4050	1480	1	1	1	1
	120	2298	2869	1829	2069	1	1	1	1
	120	1678	2000	1808	1203	1	1	1	1
	120	1696	4442	2107	3043	1	0	1	1
	120	1638	3012	1563	1350	1	1	1	1
	120	2060	1573	2637	2163	1	1	1	1
	180	2674	2003	2852	4877	1	1	1	1
	180	2351	5163	4081	3017	1	1	1	1
	180	4017	3056	3393	5146	0	1	1	1
	180	3688	1171	1911	2848	1	1	1	1
	180	3764	3753	2367	2379	0	1	1	1
	180	2357	2939	4398	2806	1	1	0	1
	240	3663	4792	8001	4331	1	1	0	1
	240	3075	3236	3254	3367	1	0	1	1
	240	3678	4281	2905	4883	1	1	1	1
	240	4217	4015	2053	5226	1	1	1	0
	240	4294	3712	6758	4453	1	1	1	1
	240	7425	2763	2670	5359	0	1	1	1
	300	1831	2944	1723	2861	1	1	1	1
	300	1926	3340	2122	3260	1	1	1	1
	300	4940	3033	3036	2419	1	1	1	1
	300	3339	3778	2098	2541	1	1	1	1
	300	4661	4047	3332	3967	1	1	1	1
	300	2393	4440	2879	3010	1	0	1	1
sub140	0	2619	3627	3728	1874	1	1	1	1
	0	3595	1960	1699	3836	1	1	1	1
	0	3971	1621	1686	1646	1	1	0	1
	0	5008	2318	2258	2691	1	1	1	1
	0	8000	3438	2195	1853	0	1	1	1
	0	3124	3417	2235	1683	1	1	1	1
	60	1768	2603	2125	1321	0	1	1	1
	60	5668	2092	1672	3039	1	1	1	1
	60	2102	2488	3040	2154	1	1	1	1
	60	2702	2000	2279	1926	1	1	0	1
	60	8000	4697	1978	2000	0	1	1	1
	60	4181	2897	1366	1806	1	1	1	1
	120	2778	3023	3649	1658	1	1	1	1
	120	3316	1801	8000	3360	1	1	0	1
	120	1794	8000	6195	4821	1	0	0	1
	120	2181	2764	2905	2350	1	1	1	1
	120	1748	5930	2990	3809	1	1	1	1
	120	2963	2369	8001	8249	1	1	0	0
	180	2068	4985	6031	3940	1	1	1	1
	180	3759	2243	2444	1277	1	1	1	0
	180	3052	5313	6940	2932	1	1	1	0
	180	5280	1828	8000	2592	1	1	0	1
	180	6666	3742	4809	2028	0	1	1	1
	180	2201	2255	2603	4753	0	1	1	1
	240	2403	7209	2252	2377	0	1	1	1
	240	2029	4134	2268	8000	0	1	1	0
	240	2845	3803	3412	6820	0	1	1	1
	240	2880	3958	2653	8000	0	1	1	0
	240	2439	2376	4395	8000	0	1	1	0
	240	2970	2322	3301	8000	0	0	1	0
	300	3650	5078	1969	1933	1	1	1	1
	300	4953	3138	2859	1729	0	1	1	1
	300	2472	4833	2359	6466	1	1	1	1
	300	2583	5402	1645	1943	1	1	1	1
	300	7512	4596	2752	1813	0	1	1	1
	300	2960	4574	6881	1955	0	1	1	1
sub144	0	5319	2527	2612	2502	1	1	1	1
	0	6122	6952	1870	2487	1	1	1	1
	0	4092	2156	1766	4342	1	1	1	1
	0	5332	2174	3077	1833	1	1	1	1
	0	4050	3418	2385	1882	1	1	1	1
	0	4689	5168	2433	3239	1	0	1	1
	60	2021	5809	1818	2205	1	1	1	1
	60	5373	3066	7570	3099	1	1	1	1
	60	4105	3175	2550	1849	0	1	1	1
	60	2051	4114	1916	2868	1	1	1	1
	60	3108	3385	2730	2305	1	1	1	1
	60	8000	2580	2938	2864	0	1	1	1
	120	2480	3354	3295	3495	1	1	1	1
	120	3594	2278	5253	3294	1	1	1	1
	120	4735	4901	2250	3655	1	1	1	1
	120	6263	8000	2988	4479	1	0	0	1
	120	2919	3914	4169	3586	1	1	1	1
	120	3857	2099	3212	1776	1	1	1	1
	180	3062	3219	8000	3153	1	1	0	1
	180	5664	8000	4768	8000	1	0	1	0
	180	2168	3243	5714	4846	1	1	0	1
	180	6027	3490	1954	3158	0	1	0	1
	180	2801	2822	5797	3613	1	1	0	1
	180	3797	4085	3180	6946	1	1	0	1
	240	5226	2729	2362	2932	1	0	0	0
	240	4472	5030	8000	7415	1	0	0	1
	240	4556	7255	8000	2725	1	0	0	1
	240	8000	5887	3234	8000	0	1	0	0
	240	4759	4091	6875	3852	0	0	1	0
	240	5490	6700	3330	4265	1	0	1	1
	300	3509	2732	3300	2114	0	1	1	1
	300	6246	3495	2175	2039	1	1	1	1
	300	2915	6460	2391	1844	1	1	0	1
	300	3085	2443	2189	2610	1	0	1	1
	300	2935	2216	2400	3094	0	0	1	0
	300	3060	2974	3224	1975	1	1	1	1
sub145	0	2552	5531	2921	1602	1	1	1	1
	0	3868	2817	1663	841	1	1	1	1
	0	4748	1890	2258	869	1	1	1	1
	0	3422	2046	3403	4318	0	1	1	1
	0	2931	2580	3156	3749	1	1	1	1
	0	4292	3959	2101	4159	1	1	1	1
	60	2855	2803	1566	3004	1	1	1	1
	60	7340	799	1747	1312	1	1	1	1
	60	3730	1810	3085	1230	1	1	1	1
	60	5220	2946	1916	2272	1	1	1	1
	60	3944	1569	2567	2986	1	1	1	1
	60	4383	8000	2476	1539	1	0	1	1
	120	3072	5314	2499	6130	1	1	1	1
	120	3149	2812	3306	2552	1	1	1	1
	120	2356	1452	1878	2414	1	1	1	1
	120	4094	3505	7084	3765	0	1	1	1
	120	2845	3826	1914	1413	1	1	1	1
	120	2902	2189	1815	1417	1	1	1	1
	180	3592	1529	5533	1833	1	1	1	1
	180	5627	1816	5409	2529	1	1	1	1
	180	3195	2594	3970	1810	1	1	0	1
	180	1428	2937	6286	2844	1	1	0	1
	180	1465	2894	3198	2925	1	1	1	1
	180	2233	1822	3252	1663	1	1	1	1
	240	4132	4640	3658	4284	0	1	1	0
	240	5176	3660	8000	4696	0	0	0	1
	240	8000	6054	2615	7056	0	0	1	1
	240	8000	5515	5459	8000	0	1	1	0
	240	4396	3472	5219	1925	1	1	1	1
	240	2528	8000	6345	8000	0	0	1	0
	300	5990	3462	2741	3502	0	1	1	1
	300	8000	6531	3379	2273	0	1	1	1
	300	2622	2905	3386	3214	1	1	1	1
	300	3231	6284	1898	1904	1	1	1	1
	300	3593	5072	4159	2764	1	1	1	1
	300	8001	1787	2141	2274	0	0	1	1
sub146	0	2327	6821	982	966	1	1	1	1
	0	1776	2217	1173	1480	1	1	1	1
	0	2070	1129	1160	1664	1	0	1	1
	0	2914	2305	1254	1523	1	1	1	1
	0	2460	2119	2113	1534	1	1	1	1
	0	2882	2206	1671	2649	1	0	1	1
	60	1797	3991	1633	1046	1	0	1	1
	60	1850	3294	1166	1141	1	1	1	1
	60	2860	2399	1197	1440	1	1	1	1
	60	1406	1582	1022	966	1	1	1	1
	60	1201	1043	2112	1657	1	0	1	1
	60	2626	3772	1479	2611	1	1	1	1
	120	2929	1576	1684	928	1	1	1	1
	120	1574	2087	1933	2270	1	1	1	1
	120	1052	3079	1171	1220	1	1	1	1
	120	1234	2708	1566	1000	1	1	0	1
	120	1452	4715	1323	2490	1	1	1	1
	120	2617	2670	1413	1023	1	1	1	1
	180	1656	1121	2327	2336	1	1	1	1
	180	1612	1470	2364	1117	1	1	1	0
	180	2454	1708	2128	1802	1	1	1	0
	180	5227	2266	3573	1342	0	1	1	1
	180	2961	3434	2814	1766	1	1	0	1
	180	3082	1032	1980	1204	1	1	1	1
	240	3606	1453	2620	1292	1	0	1	0
	240	3836	2602	7064	2423	0	1	1	1
	240	6697	2190	2149	4252	1	1	1	1
	240	3498	2024	1685	3019	1	1	1	1
	240	2043	4669	3384	2067	1	1	1	1
	240	2716	1764	1834	2690	1	1	1	1
	300	1703	1318	1956	1250	1	1	0	1
	300	2004	3801	2495	7393	1	1	1	1
	300	2620	3096	5268	4316	1	1	1	1
	300	2483	2701	2812	2146	0	1	1	1
	300	4095	2575	1240	2840	0	1	1	1
	300	3678	2625	1928	2488	1	1	1	1
sub147	0	1639	3503	866	822	1	1	1	1
	0	997	1744	2727	929	1	1	1	0
	0	1789	3159	986	766	1	1	1	1
	0	1364	1353	1379	870	1	1	1	1
	0	1482	1136	1058	1655	1	1	1	1
	0	1320	2470	772	696	1	1	0	1
	60	2127	1861	968	961	1	1	1	1
	60	1665	2282	896	725	1	1	1	1
	60	1549	1900	1450	870	1	1	1	1
	60	3581	1661	819	867	1	1	1	1
	60	1794	1331	1262	1299	1	0	1	1
	60	1242	2130	1105	722	1	1	1	1
	120	2387	1536	909	711	1	1	1	1
	120	1445	1208	1167	781	1	1	1	1
	120	1369	1432	1110	2489	1	1	1	0
	120	2039	1279	1677	896	1	1	1	1
	120	2496	2278	2579	1150	1	1	1	1
	120	2182	1123	1610	1031	1	1	1	1
	180	2289	2243	3176	3284	1	1	1	1
	180	1272	1545	2842	1829	1	1	1	1
	180	1786	5023	1880	2016	0	1	1	1
	180	2348	2823	2805	3107	1	1	1	1
	180	5989	8000	3438	2002	1	0	1	1
	180	2829	1702	2390	2017	1	1	0	1
	240	8000	1574	1146	3685	0	1	1	1
	240	1217	4838	1060	3475	1	1	1	1
	240	2327	1754	1139	1497	1	1	1	1
	240	2110	1128	4000	1349	1	1	1	1
	240	1210	6841	1384	1521	1	1	1	1
	240	2065	1453	869	2432	1	1	1	1
	300	2004	1795	1135	1362	1	1	1	1
	300	1932	1040	1464	937	1	1	1	1
	300	1535	1643	982	1538	1	1	1	1
	300	1099	1074	853	1349	1	1	1	1
	300	1346	1158	1594	1127	1	1	1	1
	300	2138	1875	1752	1518	1	1	1	1
sub148	0	5655	1247	3936	1488	1	1	1	1
	0	8000	3888	2542	5690	0	1	0	1
	0	1594	1039	2582	987	0	1	1	1
	0	3507	3436	2036	2598	0	1	0	1
	0	5016	2907	2239	2335	0	1	1	1
	0	3742	4967	6648	1185	1	1	1	1
	60	1125	7558	1364	2218	0	0	0	0
	60	1866	2848	6409	2170	0	0	0	0
	60	1620	2228	2084	3459	0	1	0	0
	60	5584	806	3489	1880	0	0	0	0
	60	1876	3086	1019	4482	0	0	0	0
	60	3117	4268	1293	1403	0	0	0	0
	120	2008	6936	3718	1000	0	0	0	0
	120	5728	1010	4642	5407	1	0	0	1
	120	2233	1820	8000	3470	0	0	0	0
	120	2768	1875	2353	1729	0	0	0	0
	120	2123	2088	1586	7801	0	0	0	1
	120	951	6214	1228	8001	0	1	0	0
	180	1079	3010	2704	1080	1	1	0	0
	180	6415	1565	6787	5189	1	0	1	0
	180	5103	2439	1206	1572	0	0	0	0
	180	6441	5026	3175	1450	1	0	1	1
	180	4956	1048	5066	2470	0	1	0	0
	180	2204	4425	1231	8000	1	1	0	0
	240	1728	5636	2037	3368	1	0	1	1
	240	1285	2926	5364	2986	1	1	1	1
	240	6479	1165	5920	2204	1	1	0	1
	240	1994	4462	1874	6317	1	1	1	0
	240	1667	2036	2853	983	1	1	1	1
	240	4080	3820	1473	2527	1	0	1	1
	300	1232	2157	7019	2542	0	1	0	1
	300	3068	2915	3893	2310	1	1	1	1
	300	1754	3470	4243	1561	1	1	1	1
	300	3468	1245	2933	1218	1	1	1	1
	300	857	1427	3438	2086	1	1	1	1
	300	6361	2386	3427	1378	1	1	1	1
sub149	0	2577	1069	1092	1531	1	1	1	1
	0	2317	1703	1135	782	1	1	1	1
	0	1328	2028	1468	994	1	1	1	1
	0	1539	1995	1204	2578	1	1	1	1
	0	1825	3283	1529	1248	1	1	1	1
	0	1773	1520	1933	1764	1	1	1	1
	60	1631	1109	1706	1760	1	1	1	1
	60	2712	1308	1177	1486	1	1	1	1
	60	1567	4948	2085	1670	1	1	1	1
	60	1714	3426	2273	942	1	1	1	1
	60	1160	2184	1093	1270	1	1	1	1
	60	1547	1859	1296	2384	1	1	1	1
	120	2148	1387	1306	2042	1	1	1	1
	120	1267	1568	1286	943	1	1	1	1
	120	1763	1515	1699	2288	1	1	1	1
	120	4689	1884	1655	2176	0	1	1	1
	120	1489	1894	2033	1857	1	1	1	1
	120	1483	1672	3921	2154	1	1	1	1
	180	2729	3259	3118	1932	1	1	1	1
	180	2232	2734	2887	1517	1	1	0	1
	180	2571	2163	3649	2343	1	1	0	1
	180	3430	1356	3434	3254	1	1	0	1
	180	1984	1730	1683	1124	1	1	1	1
	180	2055	1901	2643	2935	1	1	1	1
	240	3059	2522	2317	2919	1	1	1	1
	240	2643	887	1502	2625	1	1	1	1
	240	2490	5964	2083	2199	1	1	1	1
	240	2846	1713	3429	1302	1	1	1	1
	240	2408	2645	1646	1985	1	1	1	1
	240	2921	2309	2722	2067	1	1	1	1
	300	2323	1592	1317	283	1	1	1	1
	300	2400	2874	2077	2282	1	1	1	1
	300	1757	1745	6366	1405	1	1	1	1
	300	1936	1132	1765	2616	1	1	1	1
	300	2290	2688	2585	2193	1	1	1	1
	300	2399	1912	1854	1767	1	1	1	1
sub151	0	2765	2439	2009	1947	1	1	1	1
	0	2208	2699	2227	2268	1	1	1	1
	0	1708	2608	2782	2660	1	1	1	1
	0	2111	2523	1387	2768	1	1	1	1
	0	3495	3402	2335	1458	1	0	1	1
	0	2011	3413	3246	1550	1	1	1	1
	60	2155	1508	1672	2027	1	1	1	1
	60	2485	2527	2273	3269	1	1	1	1
	60	2846	2407	5366	1556	0	1	1	1
	60	3047	8000	1982	782	1	0	1	1
	60	2780	1405	1561	1670	1	1	1	1
	60	2618	3950	3046	2266	1	1	1	1
	120	2417	2782	1856	6802	1	1	1	1
	120	2238	2097	1612	5342	1	0	1	1
	120	2044	1638	2837	2250	1	1	1	1
	120	1822	2372	6265	3069	1	1	1	1
	120	2073	3054	2202	4430	1	1	1	1
	120	1921	1427	3863	2203	1	1	1	1
[truncated: 54 more rows]
